# Supplementary material for: Emergence of the Zoonotic Biliary Trematode Pseudamphistomum truncatum in Grey Seals (Halichoerus grypus) in the Baltic Sea
Source: PLoS One. 2016 Oct 18;11(10):e0164782. doi: 10.1371/journal.pone.0164782 (PMC5068771; doi:10.1371/journal.pone.0164782)
Supplement: S1 Appendix — (XLSX) [file pone.0164782.s001.xlsx]

## Sheet: Blad1
Year found	Accession number	Species	Sea basin: Gulf of Bothnia=1, Baltic Proper=2	County code	Sex	Age	Hepatic trematodes (0=no, 1=yes)	Cause of death: 1=fishery interaction, 2=hunted, 3=found dead/sick
2002	A2002-5018	Grey seal	1	X	Female	17	0	1
2002	A2002-5142	Grey seal	1	X	Female	3	0	1
2002	A2002-5145	Grey seal			Male	0	0	3
2002	A2002-5147	Grey seal	1	X	Female	3	0	1
2002	A2002-5149	Grey seal	2	AB	Female	2	0	1
2002	A2002-5150	Grey seal	1	AC	Male	14	0	3
2002	A2002-5151	Grey seal	1	X	Male	5	0	1
2002	A2002-5176	Grey seal	2	AB	Male	2	0	1
2002	A2003-5049	Grey seal	1	X	Male	7	0	1
2002	A2003-5050	Grey seal	1	X	Male	0	0	1
2002	A2003-5065	Grey seal	1	Y	Male	0	0	1
2002	C2002-05103	Grey seal	2	AB	Female	3	0	2
2002	C2002-05105	Grey seal	2	AB	Male	1	0	2
2002	C2002-05107	Grey seal	2	H	Male	0	0	2
2002	C2002-05111	Grey seal	1	C	Female	7	0	2
2002	C2002-05112	Grey seal	1	C	Male	4	0	2
2002	C2002-05113	Grey seal	1	C	Female	5	0	2
2002	C2002-05114	Grey seal	1	C	Female	3	0	2
2002	C2002-05115	Grey seal	1	BD	Female	13	0	2
2002	C2002-05116	Grey seal	1	BD	Male	0	0	2
2002	C2002-05117	Grey seal	1	BD	Female	12	0	2
2002	C2002-05207	Grey seal	1	BD	Female	6	0	2
2002	C2002-05208	Grey seal	1	BD	Female	5	0	2
2002	C2002-05209	Grey seal	1	BD	Female	9	0	2
2002	C2002-05210	Grey seal	1	BD	Female	4	0	2
2002	C2002-05261	Grey seal	1	BD	Female	4	0	2
2002	C2002-05262	Grey seal	1	BD	Female	8	0	2
2002	C2002-05263	Grey seal	2	E	Male	3	0	2
2002	C2002-05264	Grey seal	1	BD	Female	4	0	2
2002	C2002-05265	Grey seal	1	BD	Female	7	0	2
2002	C2002-05266	Grey seal	1	BD	Female	5	0	2
2002	C2002-05268	Grey seal	1	C	Female	15	0	2
2002	C2002-05270	Grey seal	1	BD	Male	0	0	2
2002	C2002-05271	Grey seal	1	BD	Female	14	0	2
2002	C2002-05277	Grey seal	1	C	Female	10	0	2
2002	C2002-05280	Grey seal	1	AC	Male	6	0	2
2002	C2002-05281	Grey seal	1	BD	Female	3	0	2
2002	C2002-05282	Grey seal	1	BD	Female	6	0	2
2002	C2002-05283	Grey seal	1	BD	Female	14	0	2
2002	C2002-05284	Grey seal	1	BD	Female	23	0	2
2002	C2002-05285	Grey seal	1	BD	Male	10	0	2
2002	C2002-05286	Grey seal	1	BD	Female	3	0	2
2002	C2002-05287	Grey seal	1	BD	Male	5	0	2
2002	C2002-05289	Grey seal	1	C	Male	12	0	2
2002	C2002-05290	Grey seal	1	C	Female	7	0	2
2002	C2002-05291	Grey seal	1	C	Male	17	0	2
2002	C2002-05293	Grey seal	1	C	Female	2	0	2
2002	C2002-05295	Grey seal	1	BD	Female	9	0	2
2002	C2002-05298	Grey seal	1	Y	Male	8	0	2
2002	C2002-05299	Grey seal	1	Y	Male	2	0	2
2002	C2002-05300	Grey seal	1	X	Male	11	0	2
2002	C2002-05301	Grey seal	1	X	Male	0	0	2
2002	C2002-05302	Grey seal	1	X	Male	0	0	2
2002	C2002-05304	Grey seal	1	X	Male	0	0	2
2002	C2002-05305	Grey seal	1	X	Male	7	0	2
2002	C2002-05306	Grey seal	1	X	Female	7	0	2
2002	C2002-05308	Grey seal	1	BD	Female	9	0	2
2002	C2002-05310	Grey seal	1	X	Male	0	0	2
2002	C2002-05312	Grey seal	1	X	Male	12	1	2
2002	C2002-05313	Grey seal	1	X	Male	19	0	2
2002	C2002-05314	Grey seal	1	X	Male	10	0	2
2002	C2002-05315	Grey seal	1	X	Male	11	0	2
2002	C2002-05316	Grey seal	1	X	Female	4	0	2
2002	C2002-05317	Grey seal	1	X	Female	5	0	2
2002	C2002-05318	Grey seal	1	X	Male	12	0	2
2002	C2002-05319	Grey seal			Female	12	0	2
2002	C2002-05320	Grey seal	1	X	Male	4	0	2
2002	C2002-05321	Grey seal	1	X	Male	11	0	2
2002	C2002-05322	Grey seal	1	X	Male	9	0	2
2002	C2002-05323	Grey seal	1	X	Female	2	0	2
2002	C2002-05363	Grey seal	1	AC	Male	8	0	2
2002	C2002-05364	Grey seal	2	AB	Male	1	0	2
2002	C2002-05365	Grey seal	2	AB	Female	1	0	2
2002	C2002-05366	Grey seal	2	AB	Male	1	0	2
2002	C2002-05376	Grey seal	1	X	Female	0	0	1
2002	C2002-5003	Grey seal	2	AB	Female	0	0	3
2002	C2002-5004	Grey seal	2	AB	Male	0	0	3
2002	C2002-5267	Grey seal	1	BD	Female	9	0	1
2002	C2002-5295	Grey seal	1	BD	Female	9	0	1
2002	C2002-5307	Grey seal	1	AC	Female	0	0	1
2002	C2006-05038	Grey seal	1	AC	Female	0	0	3
2003	A2003-5045	Grey seal	2	H	Male	3	0	3
2003	A2003-5051	Grey seal	2	H	Female	0	0	1
2003	A2003-5083	Grey seal	2	AB	Female	2	1	1
2003	A2003-5088	Grey seal	1	X	Male	4	0	1
2003	A2003-5106	Grey seal	1	Y	Male	5	0	1
2003	A2003-5123	Grey seal	2	H	Male	2	0	1
2003	A2003-5126	Grey seal	2	E	Female	4	0	1
2003	A2003-5135	Grey seal	2	AB	Male	3	0	1
2003	A2003-5137	Grey seal	1	X	Male	4	0	1
2003	A2003-5138	Grey seal	1	X	Male	7	1	1
2003	A2003-5139	Grey seal	2	H	Male	3	0	1
2003	A2003-5143	Grey seal	2	AB	Male	4	0	1
2003	A2003-5144	Grey seal	2	E	Male	0	0	1
2003	A2003-5145	Grey seal	2	E	Male	0	0	1
2003	A2003-5146	Grey seal	2	AB	Male	21	1	1
2003	A2003-5149	Grey seal	1	Y	Male	4	0	1
2003	A2003-5150	Grey seal	1	Y	Male	3	0	1
2003	A2003-5151	Grey seal	1	X	Male	11	0	1
2003	A2003-5155	Grey seal	1	X	Male	7	0	1
2003	A2003-5156	Grey seal	1	C	Male	6	1	1
2003	A2003-5157	Grey seal	1	C	Male	3	0	1
2003	A2004-5015	Grey seal	2	AB	Male	4	1	1
2003	A2004-5023	Grey seal	2	AB	Male	>32	0	3
2003	A2004-5025	Grey seal			Male	10	0	1
2003	A2004-5158	Grey seal	2	AB	Male	4	0	1
2003	A2004-5267	Grey seal	1	X	Male	2	0	1
2003	A2004-5268	Grey seal	1	X	Female	3	0	1
2003	A2005-05008	Grey seal	2	E	Male	2	0	1
2003	C2003-05242	Grey seal	1	X	Female	Not available	0	2
2003	C2003-05244	Grey seal	2	D	Male	25	1	2
2003	C2003-05245	Grey seal	1	X	Male	0	0	2
2003	C2003-05246	Grey seal	1	X	Female	18	0	2
2003	C2003-05248	Grey seal	1	X	Female	7	0	2
2003	C2003-05250	Grey seal	1	BD	Female	5	0	2
2003	C2003-05252	Grey seal	1	X	Male	6	0	2
2003	C2003-05253	Grey seal	1	X	Male	12	0	2
2003	C2003-05254	Grey seal	1	X	Female	2	0	2
2003	C2003-05256	Grey seal	1	C	Female	4	0	2
2003	C2003-05258	Grey seal	1	BD	Female	Not available	0	2
2003	C2003-05259	Grey seal	1	X	Female	Not available	0	2
2003	C2003-05260	Grey seal	1	BD	Female	3	0	2
2003	C2003-05261	Grey seal	1	BD	Female	10	0	2
2003	C2003-05262	Grey seal	1	BD	Female	3	0	2
2003	C2003-05263	Grey seal	1	BD	Female	5	0	2
2003	C2003-05264	Grey seal	1	X	Male	9	1	2
2003	C2003-05265	Grey seal	1	BD	Female	9	0	2
2003	C2003-05266	Grey seal	1	BD	Female	6	0	2
2003	C2003-05267	Grey seal	1	BD	Female	9	0	2
2003	C2003-05268	Grey seal	1	BD	Female	18	0	2
2003	C2003-05269	Grey seal	1	BD	Male	5	0	2
2003	C2003-05270	Grey seal	1	BD	Female	9	0	2
2003	C2003-05271	Grey seal	1	BD	Female	5	0	2
2003	C2003-05272	Grey seal	1	BD	Female	26	0	2
2003	C2003-05273	Grey seal	1	BD	Female	10	0	2
2003	C2003-05274	Grey seal	1	BD	Male	0	0	2
2003	C2003-05275	Grey seal	1	BD	Female	9	0	2
2003	C2003-05276	Grey seal	1	BD	Female	5	0	2
2003	C2003-05277	Grey seal	1	BD	Female	5	0	2
2003	C2003-05278	Grey seal	1	BD	Female	10	0	2
2003	C2003-05279	Grey seal	1	AC	Male	4	0	2
2003	C2003-05283	Grey seal	1	AC	Female	4	0	2
2003	C2003-05285	Grey seal	1	BD	Female	5	0	2
2003	C2003-05290	Grey seal	1	BD	Female	11	0	2
2003	C2003-05291	Grey seal	1	BD	Female	6	0	2
2003	C2003-05292	Grey seal	1	BD	Female	12	0	2
2003	C2003-05293	Grey seal	1	BD	Female	9	0	2
2003	C2003-05294	Grey seal	1	BD	Female	7	0	2
2003	C2003-05296	Grey seal	1	X	Female	0	0	2
2003	C2003-05297	Grey seal	1	X	Female	4	0	2
2003	C2003-05298	Grey seal	1	X	Female	15	0	2
2003	C2003-05299	Grey seal	1	BD	Female	6	0	2
2003	C2003-05300	Grey seal	1	BD	Female	11	0	2
2003	C2003-05303	Grey seal	1	X	Male	4	0	2
2003	C2003-05304	Grey seal	1	X	Female	>20	0	2
2003	C2003-05305	Grey seal	1	X	Male	5	0	2
2003	C2003-05306	Grey seal	1	X	Male	7	1	2
2003	C2003-05307	Grey seal	1	BD	Female	12	0	2
2003	C2003-05309	Grey seal	1	X	Female	9	0	2
2003	C2003-05311	Grey seal	1	BD	Female	11	0	2
2003	C2003-05312	Grey seal	1	X	Female	Not available	0	2
2003	C2003-05313	Grey seal	1	BD	Female	6	0	2
2003	C2003-05314	Grey seal	1	AC	Female	9	0	2
2003	C2003-05315	Grey seal			Unknown	4	0	2
2003	C2003-05316	Grey seal	1	X	Female	1	0	2
2003	C2003-05317	Grey seal	1	X	Male	15	0	2
2003	C2003-05318	Grey seal	1	X	Male	3	0	2
2003	C2003-05319	Grey seal	1	BD	Female	11	0	2
2003	C2003-05322	Grey seal	1	Y	Male	12	0	2
2003	C2003-05323	Grey seal			Male	Not available	0	2
2003	C2003-05324	Grey seal	2	H	Female	2	0	2
2003	C2003-05348	Grey seal	1	X	Female	4	0	2
2003	C2003-5007	Grey seal	1	X	Male	4	1	1
2003	C2003-5008	Grey seal	1	X	Male	13	0	1
2003	C2003-5011	Grey seal	2	AB	Male	0	0	1
2003	C2003-5014	Grey seal	2	E	Female	0	1	1
2003	C2003-5021	Grey seal	2	AB	Male	0	0	1
2003	C2003-5022	Grey seal	2	E	Male	0	0	1
2003	C2003-5023	Grey seal	2	E	Female	0	0	1
2003	C2003-5025	Grey seal	2	E	Male	0	0	1
2003	C2003-5140	Grey seal			Male	0	0	1
2003	C2003-5162	Grey seal	1	X	Male	0	0	1
2003	C2003-5186	Grey seal	1	X	Female	4	0	1
2003	C2003-5187	Grey seal	2	M	Male	0	0	1
2003	C2003-5188	Grey seal	2	M	Male	0	0	1
2003	C2003-5189	Grey seal	1	X	Male	0	0	3
2003	C2003-5251	Grey seal	1	X	Female	0	0	1
2003	C2003-5282	Grey seal	1	X	Female	2	0	1
2003	C2003-5286	Grey seal	1	X	Male	6	1	1
2003	C2005-05062	Grey seal	1	Y	Male	0	0	1
2004	A2004-5049	Grey seal	2	D	Male	3	0	1
2004	A2004-5154	Grey seal	2	AB	Female	3	0	1
2004	A2004-5161	Grey seal	2	AB	Female	0	0	1
2004	A2004-5215	Grey seal	1	Y	Female	12	0	1
2004	A2004-5221	Grey seal	1	Y	Male	6	0	1
2004	A2004-5231	Grey seal	2	E	Male	2	0	1
2004	A2004-5234	Grey seal	2	AB	Male	3	0	1
2004	A2004-5235	Grey seal	2	AB	Male	3	0	1
2004	A2004-5236	Grey seal	1	X	Male	11	0	1
2004	A2004-5237	Grey seal	2	H	Female	2	0	1
2004	A2004-5238	Grey seal	2	H	Male	2	0	1
2004	A2004-5239	Grey seal	2	H	Female	2	0	1
2004	A2004-5240	Grey seal	2	H	Male	3	0	1
2004	A2004-5243	Grey seal	2	H	Male	4	0	1
2004	A2004-5246	Grey seal	2	H	Male	2	0	1
2004	A2004-5247	Grey seal	2	H	Male	4	0	1
2004	A2004-5248	Grey seal	2	H	Female	3	0	1
2004	A2004-5260	Grey seal	2	H	Male	3	0	1
2004	A2004-5273	Grey seal	2	H	Male	5	0	1
2004	A2004-5291	Grey seal	2	H	Male	0	0	1
2004	A2004-5300	Grey seal	1	X	Female	17	0	1
2004	A2004-5323	Grey seal	2	E	Male	6	0	1
2004	A2005-05170	Grey seal	2	AB	Male	2	0	1
2004	C2004-05005	Grey seal	1	X	Female	23	0	2
2004	C2004-05024	Grey seal	2	AB	Female	0	0	2
2004	C2004-05027	Grey seal	2	AB	Female	0	0	2
2004	C2004-05028	Grey seal	2	AB	Female	4	0	2
2004	C2004-05029	Grey seal	2	AB	Female	0	0	2
2004	C2004-05033	Grey seal	2	E	Male	3	0	2
2004	C2004-05034	Grey seal	1	Y	Male	2	0	2
2004	C2004-05035	Grey seal	1	Y	Female	17	0	2
2004	C2004-05039	Grey seal	1	X	Male	12	0	2
2004	C2004-05073	Grey seal	1	C	Female	0	0	2
2004	C2004-05294	Grey seal	1	C	Female	0	0	2
2004	C2004-05295	Grey seal			Female	2	0	2
2004	C2004-05296	Grey seal	1	AC	Male	0	0	2
2004	C2004-05297	Grey seal	1	X	Male	4	0	2
2004	C2004-05299	Grey seal	1	X	Female	4	0	2
2004	C2004-05301	Grey seal	1	X	Female	11	0	2
2004	C2004-05302	Grey seal	1	X	Male	6	0	2
2004	C2004-05303	Grey seal	1	X	Male	9	0	2
2004	C2004-05304	Grey seal	1	X	Male	3	0	1
2004	C2004-05305	Grey seal	1	BD	Male	2	0	2
2004	C2004-05306	Grey seal	1	BD	Female	7	0	2
2004	C2004-05307	Grey seal	1	BD	Female	4	0	2
2004	C2004-05308	Grey seal	1	BD	Female	11	0	2
2004	C2004-05309	Grey seal	1	BD	Female	1	0	2
2004	C2004-05310	Grey seal	1	BD	Male	1	0	2
2004	C2004-05311	Grey seal	1	BD	Male	0	0	2
2004	C2004-05312	Grey seal	1	BD	Female	4	0	2
2004	C2004-05313	Grey seal	1	BD	Female	12	0	2
2004	C2004-05314	Grey seal	1	BD	Female	6	0	2
2004	C2004-05315	Grey seal	1	BD	Female	9	0	2
2004	C2004-05316	Grey seal	1	BD	Male	13	0	2
2004	C2004-05317	Grey seal	1	BD	Female	4	0	2
2004	C2004-05318	Grey seal	1	BD	Male	12	0	2
2004	C2004-05319	Grey seal	1	BD	Female	9	0	2
2004	C2004-05320	Grey seal	1	BD	Female	10	0	2
2004	C2004-05321	Grey seal	1	BD	Male	2	0	2
2004	C2004-05322	Grey seal	1	BD	Male	1	0	2
2004	C2004-05323	Grey seal	1	BD	Female	4	0	2
2004	C2004-05324	Grey seal	1	BD	Female	6	0	2
2004	C2004-05325	Grey seal	2	AB	Male	10	1	2
2004	C2004-05326	Grey seal	1	BD	Female	1	0	2
2004	C2004-05327	Grey seal	1	BD	Female	8	0	2
2004	C2004-05328	Grey seal	1	BD	Female	9	0	2
2004	C2004-05329	Grey seal	1	BD	Male	3	0	2
2004	C2004-05330	Grey seal	1	BD	Male	5	0	2
2004	C2004-05331	Grey seal	1	BD	Female	4	0	2
2004	C2004-05332	Grey seal	1	BD	Female	7	0	2
2004	C2004-05333	Grey seal	1	BD	Female	7	0	2
2004	C2004-05334	Grey seal	1	BD	Male	3	0	2
2004	C2004-05335	Grey seal	1	BD	Male	0	0	2
2004	C2004-05336	Grey seal	1	BD	Female	2	0	2
2004	C2004-05337	Grey seal	1	BD	Female	3	0	2
2004	C2004-05338	Grey seal	1	BD	Female	15	0	2
2004	C2004-05339	Grey seal	1	BD	Male	14	0	2
2004	C2004-05340	Grey seal	2	H	Male	6	0	2
2004	C2004-05341	Grey seal	1	X	Female	9	0	2
2004	C2004-05342	Grey seal	2	H	Male	6	0	2
2004	C2004-05343	Grey seal	2	D	Female	3	0	2
2004	C2004-05344	Grey seal	1	X	Male	5	0	2
2004	C2004-05345	Grey seal	1	X	Female	4	0	2
2004	C2004-05346	Grey seal	1	X	Male	3	0	2
2004	C2004-05348	Grey seal	2	H	Male	3	0	2
2004	C2004-05349	Grey seal	1	X	Male	7	0	2
2004	C2004-05350	Grey seal	1	X	Male	4	0	2
2004	C2004-05351	Grey seal	1	X	Female	5	0	2
2004	C2004-05352	Grey seal	1	X	Male	10	0	1
2004	C2004-05353	Grey seal	1	X	Male	4	0	2
2004	C2004-05354	Grey seal	1	X	Male	22	0	2
2004	C2004-05355	Grey seal	1	X	Male	5	0	2
2004	C2004-05356	Grey seal	2	AB	Female	6	0	2
2004	C2004-05357	Grey seal	2	D	Male	6	1	2
2004	C2004-05358	Grey seal	1	X	Female	10	1	2
2004	C2004-05360	Grey seal	1	AC	Male	7	0	2
2004	C2004-05361	Grey seal	1	X	Female	2	0	1
2004	C2004-05362	Grey seal	1	AC	Female	0	0	2
2004	C2004-05363	Grey seal	1	X	Male	3	0	2
2004	C2004-05364	Grey seal	1	Y	Male	11	0	2
2004	C2004-5002	Grey seal	2	H	Male	0	0	1
2004	C2004-5003	Grey seal	2	AB	Female	0	0	1
2004	C2004-5004	Grey seal	2	I	Female	0	0	1
2004	C2004-5007	Grey seal	2	AB	Female	0	0	1
2004	C2004-5010	Grey seal	2	AB	Female	0	0	1
2004	C2004-5011	Grey seal	2	H	Female	0	0	1
2004	C2004-5013	Grey seal	1	Y	Male	0	0	1
2004	C2004-5014	Grey seal	1	X	Male	0	0	1
2004	C2004-5015	Grey seal	2	AB	Female	0	0	1
2004	C2004-5016	Grey seal	2	D	Male	0	0	1
2004	C2004-5017	Grey seal	1	C	Female	0	0	1
2004	C2004-5018	Grey seal	1	Y	Male	0	0	1
2004	C2004-05019	Grey seal	1	AC	Male	0	0	3
2004	C2004-5020	Grey seal	2	D	Male	0	0	3
2004	C2004-5021	Grey seal	2	H	Female	0	0	1
2004	C2004-5022	Grey seal	2	H	Female	0	0	1
2004	C2004-5023	Grey seal	2	H	Female	0	0	1
2004	C2004-5025	Grey seal	2	AB	Female	0	0	1
2004	C2004-5030	Grey seal	2	AB	Female	0	0	1
2004	C2004-5037	Grey seal	2	AB	Male	0	0	1
2004	C2004-5038	Grey seal	2	E	Female	0	0	1
2004	C2004-5040	Grey seal	2	H	Male	0	0	1
2004	C2004-5041	Grey seal	2	H	Female	0	0	1
2004	C2004-5042	Grey seal	2	H	Male	19	0	3
2004	C2004-05074	Grey seal	1	X	Male	11	1	2
2004	C2004-05290	Grey seal	1	X	Female	Not available	0	1
2004	C2004-5291	Grey seal	1	X	Male	3	0	1
2004	C2004-5292	Grey seal	1	X	Male	0	0	1
2004	C2004-5293	Grey seal	1	X	Male	0	0	1
2004	C2004-5298	Grey seal	1	X	Male	9	0	1
2004	C2004-5304	Grey seal	1	X	Male	3	0	1
2004	C2004-5352	Grey seal	1	X	Male	10	0	1
2004	C2004-5361	Grey seal	1	X	Female	2	0	1
2004	C2004-5575	Grey seal	1	X	Female	0	0	1
2004	C2004-5576	Grey seal	1	X	Female	3	0	1
2004	C2004-5577	Grey seal	1	X	Female	0	0	1
2004	C2004-5578	Grey seal	1	X	Male	15	0	1
2004	C2004-5579	Grey seal	1	X	Male	6	0	1
2005	A2005-05002	Grey seal	1	X	Male	13	0	1
2005	A2005-05079	Grey seal	2	D	Male	5	0	1
2005	A2005-05081	Grey seal	2	D	Male	14	0	3
2005	A2005-05086	Grey seal	2	AB	Male	2	0	1
2005	A2005-05124	Grey seal	1	Y	Male	6	0	1
2005	A2005-05126	Grey seal	1	Y	Female	16	0	1
2005	A2005-05127	Grey seal	1	Y	Female	3	0	1
2005	A2005-05164	Grey seal	2	E	Female	4	0	1
2005	A2005-05167	Grey seal	2	AB	Female	3	0	1
2005	A2005-05168	Grey seal	2	E	Female	3	0	1
2005	A2005-05169	Grey seal	2	E	Female	3	0	1
2005	A2005-05171	Grey seal	2	AB	Male	3	0	1
2005	A2005-05172	Grey seal	2	AB	Male	3	0	1
2005	A2005-05173	Grey seal	2	AB	Female	0	0	1
2005	A2005-05174	Grey seal	2	AB	Male	2	0	1
2005	A2005-05175	Grey seal	1	X	Male	8	0	1
2005	A2005-05176	Grey seal	1	X	Male	12	0	1
2005	A2005-05177	Grey seal	1	X	Male	4	0	1
2005	A2005-05178	Grey seal	2	E	Male	2	0	1
2005	A2005-05179	Grey seal	2	AB	Male	28	0	1
2005	A2005-05180	Grey seal	2	AB	Male	20	0	1
2005	A2005-05218	Grey seal	2	M	Male	3	0	1
2005	A2005-05221	Grey seal	2	E	Female	1	0	1
2005	A2005-05222	Grey seal	1	X	Male	8	0	1
2005	A2005-05265	Grey seal	2	E	Female	1	0	1
2005	A2005-05266	Grey seal	2	E	Male	1	0	1
2005	A2005-05267	Grey seal	2	E	Male	2	0	1
2005	A2005-05284	Grey seal	1	X	Male	15	0	1
2005	A2005-05290	Grey seal	1	X	Female	20	0	1
2005	A2005-05295	Grey seal	1	X	Male	9	0	1
2005	A2005-05301	Grey seal	1	X	Female	19	0	1
2005	A2006-05025	Grey seal	2	AB	Female	0	0	1
2005	A2006-05039	Grey seal	2	D	Male	1	0	1
2005	A2006-05172	Grey seal	2	H	Female	3	0	1
2005	A2006-05179	Grey seal	2	H	Male	3	0	1
2005	A2006-05423	Grey seal	2	H	Female	1	0	1
2005	A2007-05102	Grey seal	2	H	Male	1	0	1
2005	A2010-05065	Grey seal			Male	0	0	3
2005	C2005-05002	Grey seal	2	H	Female	0	0	1
2005	C2005-05003	Grey seal			Male	3	0	3
2005	C2005-05004	Grey seal	2	AB	Female	0	0	2
2005	C2005-05005	Grey seal	2	AB	Female	0	0	3
2005	C2005-05006	Grey seal	2	AB	Female	0	0	1
2005	C2005-05007	Grey seal	2	AB	Male	0	0	1
2005	C2005-05008	Grey seal	2	K	Male	0	0	1
2005	C2005-05009	Grey seal	1	C	Female	0	0	1
2005	C2005-05010	Grey seal	1	C	Male	0	0	1
2005	C2005-05011	Grey seal	2	H	Male	0	0	1
2005	C2005-05012	Grey seal	2	AB	Male	0	0	1
2005	C2005-05013	Grey seal	2	AB	Male	0	0	1
2005	C2005-05014	Grey seal	2	AB	Female	0	0	1
2005	C2005-05015	Grey seal	2	I	Female	0	0	1
2005	C2005-05016	Grey seal	2	I	Female	0	0	1
2005	C2005-05017	Grey seal	2	I	Male	0	0	1
2005	C2005-05018	Grey seal	2	I	Female	0	0	1
2005	C2005-05019	Grey seal	2	I	Female	0	0	1
2005	C2005-05021	Grey seal	1	AC	Female	0	0	1
2005	C2005-05022	Grey seal	1	AC	Female	0	0	1
2005	C2005-05023	Grey seal	2	AB	Female	0	0	1
2005	C2005-05024	Grey seal	2	AB	Female	0	0	1
2005	C2005-05025	Grey seal	2	AB	Female	0	0	1
2005	C2005-05026	Grey seal			Female	0	0	1
2005	C2005-05027	Grey seal	2	K	Male	0	0	1
2005	C2005-05028	Grey seal	1	C	Male	Not available	0	2
2005	C2005-05029	Grey seal	1	C	Male	Not available	0	2
2005	C2005-05030	Grey seal	1	C	Female	Not available	0	2
2005	C2005-05031	Grey seal	1	C	Female	Not available	0	2
2005	C2005-05057	Grey seal	1	X	Male	11	0	2
2005	C2005-05060	Grey seal	1	C	Male	2	0	1
2005	C2005-05164	Grey seal	1	Y	Male	9	0	2
2005	C2005-05165	Grey seal	1	AC	Male	11	0	2
2005	C2005-05166	Grey seal	1	X	Female	17	0	2
2005	C2005-05167	Grey seal	1	X	Female	0	0	2
2005	C2005-05169	Grey seal	1	AC	Male	10	0	2
2005	C2005-05170	Grey seal	1	AC	Male	9	0	2
2005	C2005-05171	Grey seal	1	X	Male	20	0	2
2005	C2005-05172	Grey seal	1	X	Male	7	0	2
2005	C2005-05173	Grey seal	1	X	Female	1	1	2
2005	C2005-05174	Grey seal	1	AC	Female	20	0	2
2005	C2005-05175	Grey seal	1	X	Female	2	0	2
2005	C2005-05176	Grey seal			Male	1	0	2
2005	C2005-05259	Grey seal	1	AC	Male	0	0	2
2005	C2005-05260	Grey seal	2	H	Male	3	0	2
2005	C2005-05261	Grey seal	1	X	Male	9	0	2
2005	C2005-05262	Grey seal	2	H	Male	6	0	2
2005	C2005-05263	Grey seal	1	X	Male	21	0	2
2005	C2005-05264	Grey seal	1	AC	Female	0	0	2
2005	C2005-05265	Grey seal	1	AC	Female	0	0	2
2005	C2005-05266	Grey seal	1	X	Male	9	0	2
2005	C2005-05267	Grey seal	2	AB	Female	2	0	2
2005	C2005-05268	Grey seal	2	AB	Male	1	0	2
2005	C2005-05269	Grey seal	1	AC	Female	7	0	2
2005	C2005-05270	Grey seal	1	AC	Female	0	0	2
2005	C2005-05271	Grey seal	1	AC	Male	8	0	2
2005	C2005-05272	Grey seal	2	H	Female	2	0	2
2005	C2005-05273	Grey seal	1	C	Female	Not available	0	2
2005	C2005-05274	Grey seal	1	C	Female	Not available	0	2
2005	C2005-05276	Grey seal	1	BD	Female	3	0	2
2005	C2005-05277	Grey seal	1	BD	Female	9	0	2
2005	C2005-05278	Grey seal	1	BD	Male	9	0	2
2005	C2005-05280	Grey seal	1	BD	Female	12	0	2
2005	C2005-05281	Grey seal	1	BD	Male	5	0	2
2005	C2005-05282	Grey seal	1	BD	Female	17	0	2
2005	C2005-05283	Grey seal	1	BD	Female	10	0	2
2005	C2005-05284	Grey seal	1	BD	Female	4	0	2
2005	C2005-05285	Grey seal	1	BD	Female	13	0	2
2005	C2005-05286	Grey seal	1	BD	Female	15	0	2
2005	C2005-05287	Grey seal	1	BD	Female	11	0	2
2005	C2005-05288	Grey seal	1	BD	Female	9	0	2
2005	C2005-05289	Grey seal	1	BD	Female	10	0	2
2005	C2005-05290	Grey seal	1	BD	Female	3	0	2
2005	C2005-05291	Grey seal	1	BD	Female	6	0	2
2005	C2005-05292	Grey seal	1	BD	Female	19	0	2
2005	C2005-05293	Grey seal	1	BD	Female	7	0	2
2005	C2005-05294	Grey seal	1	BD	Female	6	0	2
2005	C2005-05295	Grey seal	1	BD	Female	5	0	2
2005	C2005-05296	Grey seal	1	BD	Female	12	0	2
2005	C2005-05297	Grey seal	1	BD	Female	6	0	2
2005	C2005-05298	Grey seal	1	BD	Male	3	0	2
2005	C2005-05299	Grey seal	1	BD	Female	8	0	2
2005	C2005-05300	Grey seal	1	BD	Female	7	0	2
2005	C2005-05301	Grey seal	1	BD	Female	11	0	2
2005	C2005-05302	Grey seal	1	BD	Female	6	0	2
2005	C2005-05303	Grey seal	1	BD	Female	4	0	2
2005	C2005-05304	Grey seal	1	BD	Female	13	0	2
2005	C2005-05305	Grey seal	1	BD	Female	16	0	2
2005	C2005-05306	Grey seal	1	BD	Female	12	0	2
2005	C2005-05307	Grey seal	1	BD	Female	6	0	2
2005	C2005-05308	Grey seal	1	BD	Female	9	0	2
2005	C2005-05309	Grey seal	1	BD	Male	1	0	2
2005	C2005-05310	Grey seal	1	BD	Female	11	0	2
2005	C2005-05311	Grey seal	1	BD	Female	17	0	2
2005	C2005-05312	Grey seal	1	AC	Female	16	0	2
2005	C2005-05313	Grey seal	1	X	Female	15	0	2
2005	C2005-05315	Grey seal	1	X	Female	9	0	2
2005	C2005-05316	Grey seal	1	C	Female	1	0	2
2005	C2005-05317	Grey seal	1	C	Female	0	0	2
2005	C2005-05318	Grey seal	1	C	Male	0	0	2
2005	C2005-05319	Grey seal	1	C	Male	0	0	2
2005	C2005-05320	Grey seal	1	X	Male	6	0	2
2005	C2005-05331	Grey seal	1	AC	Male	0	0	2
2005	C2005-05332	Grey seal	1	X	Female	2	0	1
2005	C2005-05333	Grey seal	1	X	Male	Not available	0	1
2005	C2005-05334	Grey seal	1	X	Female	2	0	1
2005	C2005-05335	Grey seal	1	X	Female	6	0	1
2005	C2005-05336	Grey seal	1	X	Male	7	0	1
2005	C2005-05337	Grey seal	1	X	Male	5	0	1
2005	C2005-05338	Grey seal	1	X	Female	18	0	1
2005	C2005-05340	Grey seal	1	X	Male	0	0	1
2005	C2005-05344	Grey seal	1	X	Male	2	0	1
2005	C2005-05345	Grey seal	2	E	Male	0	0	1
2005	C2005-05375	Grey seal	1	X	Male	2	0	1
2005	C2005-05376	Grey seal	1	X	Male	6	0	1
2005	C2006-05003	Grey seal	2	K	Male	0	0	1
2005	C2006-05030	Grey seal	2	AB	Female	0	0	1
2005	C2006-05032	Grey seal	1	C	Male	8	1	3
2005	C2007-07864	Grey seal	2	D	Male	2	0	1
2006	A2006-05008	Grey seal	1	X	Male	16	0	1
2006	A2006-05012	Grey seal	1	X	Male	13	0	1
2006	A2006-05014	Grey seal	1	X	Male	11	0	1
2006	A2006-05015	Grey seal	1	X	Male	9	0	1
2006	A2006-05016	Grey seal	1	X	Male	10	0	1
2006	A2006-05188	Grey seal	2	AB	Male	2	0	1
2006	A2006-05194	Grey seal	1	X	Male	9	0	1
2006	A2006-05196	Grey seal	2	AB	Male	4	0	1
2006	A2006-05200	Grey seal	2	AB	Male	5	0	1
2006	A2006-05204	Grey seal	1	Y	Male	4	0	1
2006	A2006-05207	Grey seal	1	X	Male	2	1	1
2006	A2006-05225	Grey seal	1	X	Female	21	0	1
2006	A2006-05255	Grey seal	2	AB	Female	0	0	1
2006	A2006-05378	Grey seal	1	X	Male	16	0	1
2006	A2006-05384	Grey seal	2	AB	Female	3	0	1
2006	A2006-05386	Grey seal	1	AC	Male	5	0	2
2006	A2006-05387	Grey seal	1	X	Female	2	0	1
2006	A2006-05391	Grey seal	1	X	Male	4	0	1
2006	A2006-05392	Grey seal	2	E	Female	1	0	1
2006	A2006-05398	Grey seal	2	E	Male	3	0	1
2006	A2006-05399	Grey seal	2	E	Male	2	0	1
2006	A2006-05407	Grey seal	2	H	Male	1	0	1
2006	A2006-05409	Grey seal	2	E	Male	3	1	1
2006	A2006-05422	Grey seal	1	X	Female	5	0	1
2006	A2006-05426	Grey seal	2	E	Male	3	0	1
2006	A2006-05428	Grey seal	1	X	Male	2	0	1
2006	A2006-05429	Grey seal	1	X	Male	12	0	1
2006	A2006-05434	Grey seal	1	X	Male	13	0	1
2006	A2006-05435	Grey seal	2	E	Female	3	0	1
2006	A2006-05436	Grey seal	2	E	Female	3	1	1
2006	A2006-05437	Grey seal	1	X	Male	8	0	1
2006	A2007-05041	Grey seal	2	AB	Male	2	0	1
2006	A2010-05203	Grey seal	2	M	Male	0	0	3
2006	C20060-05283	Grey seal	1	X	Male	15	0	2
2006	C2006-05004	Grey seal	2	AB	Male	0	0	2
2006	C2006-05005	Grey seal	1	Y	Male	0	0	1
2006	C2006-05006	Grey seal	2	AB	Female	0	0	3
2006	C2006-05007	Grey seal	2	AB	Male	10	1	2
2006	C2006-05008	Grey seal	2	H	Female	0	0	1
2006	C2006-05009	Grey seal	2	H	Female	0	0	1
2006	C2006-05010	Grey seal	2	H	Male	0	0	1
2006	C2006-05011	Grey seal	2	AB	Female	0	0	2
2006	C2006-05012	Grey seal	2	H	Male	0	0	1
2006	C2006-05013	Grey seal	2	H	Female	0	0	1
2006	C2006-05014	Grey seal	2	H	Female	0	0	1
2006	C2006-05015	Grey seal	2	H	Male	0	0	1
2006	C2006-05016	Grey seal	2	AB	Male	0	0	1
2006	C2006-05017	Grey seal	2	AB	Female	0	0	1
2006	C2006-05018	Grey seal	2	AB	Male	0	0	1
2006	C2006-05019	Grey seal	2	AB	Female	0	0	1
2006	C2006-05020	Grey seal	2	AB	Male	0	0	1
2006	C2006-05021	Grey seal	2	AB	Female	0	0	1
2006	C2006-05022	Grey seal	1	C	Male	0	0	1
2006	C2006-05023	Grey seal	2	I	Female	0	0	1
2006	C2006-05024	Grey seal	2	I	Male	0	0	1
2006	C2006-05025	Grey seal	1	C	Male	0	0	1
2006	C2006-05026	Grey seal	2	AB	Male	0	0	1
2006	C2006-05027	Grey seal	2	AB	Male	0	0	1
2006	C2006-05028	Grey seal	2	AB	Female	0	0	1
2006	C2006-05029	Grey seal	1	C	Male	0	0	1
2006	C2006-05033	Grey seal	1	X	Male	18	0	2
2006	C2006-05034	Grey seal	1	X	Male	8	0	2
2006	C2006-05036	Grey seal	2	AB	Female	2	0	2
2006	C2006-05037	Grey seal	2	AB	Female	0	0	2
2006	C2006-05039	Grey seal	2	AB	Male	20	0	2
2006	C2006-05040	Grey seal	2	AB	Male	0	0	2
2006	C2006-05041	Grey seal	2	AB	Male	1	0	2
2006	C2006-05042	Grey seal	2	AB	Male	0	0	2
2006	C2006-05043	Grey seal	2	AB	Male	0	0	2
2006	C2006-05044	Grey seal	2	AB	Female	0	0	2
2006	C2006-05045	Grey seal	2	AB	Male	0	0	2
2006	C2006-05046	Grey seal	2	AB	Male	0	0	2
2006	C2006-05047	Grey seal	1	BD	Female	5	0	2
2006	C2006-05048	Grey seal	1	BD	Female	10	0	2
2006	C2006-05049	Grey seal	1	BD	Female	3	0	2
2006	C2006-05050	Grey seal	1	X	Male	18	1	2
2006	C2006-05051	Grey seal	1	BD	Female	20	0	2
2006	C2006-05052	Grey seal	1	BD	Female	2	0	2
2006	C2006-05053	Grey seal	1	BD	Female	2	0	2
2006	C2006-05054	Grey seal	1	BD	Female	7	0	2
2006	C2006-05055	Grey seal	1	BD	Male	3	0	2
2006	C2006-05056	Grey seal	1	BD	Male	1	0	2
2006	C2006-05057	Grey seal	1	BD	Female	10	0	2
2006	C2006-05058	Grey seal	1	X	Female	0	0	1
2006	C2006-05059	Grey seal	1	X	Male	0	0	1
2006	C2006-05060	Grey seal	1	BD	Female	15	0	2
2006	C2006-05061	Grey seal	1	BD	Female	12	0	2
2006	C2006-05062	Grey seal	1	BD	Female	1	0	2
2006	C2006-05063	Grey seal	1	BD	Female	1	0	2
2006	C2006-05064	Grey seal	1	BD	Male	2	0	2
2006	C2006-05065	Grey seal	1	BD	Female	8	0	2
2006	C2006-05066	Grey seal	1	X	Male	13	0	2
2006	C2006-05067	Grey seal	1	X	Male	2	0	2
2006	C2006-05068	Grey seal	1	X	Male	13	0	1
2006	C2006-05069	Grey seal	1	X	Male	19	0	2
2006	C2006-05070	Grey seal	1	X	Male	14	1	2
2006	C2006-05071	Grey seal	2	H	Female	0	0	1
2006	C2006-05074	Grey seal	2	E	Female	6	0	2
2006	C2006-05075	Grey seal	2	E	Female	25	0	2
2006	C2006-05076	Grey seal	1	X	Female	0	0	1
2006	C2006-05078	Grey seal	1	BD	Male	2	0	2
2006	C2006-05079	Grey seal	1	BD	Male	2	0	2
2006	C2006-05080	Grey seal	2	AB	Male	0	0	1
2006	C2006-05081	Grey seal	1	BD	Male	3	0	2
2006	C2006-05082	Grey seal			Female	0	0	1
2006	C2006-05083	Grey seal	1	X	Female	5	0	2
2006	C2006-05084	Grey seal	1	X	Female	4	0	2
2006	C2006-05085	Grey seal	1	X	Female	15	1	2
2006	C2006-05086	Grey seal	1	Y	Male	1	0	2
2006	C2006-05087	Grey seal	1	X	Female	4	0	1
2006	C2006-05088	Grey seal	1	AC	Male	0	0	2
2006	C2006-05089	Grey seal	2	H	Male	0	0	2
2006	C2006-05090	Grey seal	1	X	Female	1	0	2
2006	C2006-05091	Grey seal	1	X	Male	2	0	1
2006	C2006-05092	Grey seal	1	X	Female	3	0	2
2006	C2006-05093	Grey seal	1	X	Female	3	0	2
2006	C2006-05094	Grey seal	2	AB	Male	0	0	2
2006	C2006-05095	Grey seal	2	AB	Female	0	0	2
2006	C2006-05096	Grey seal	2	AB	Female	0	0	2
2006	C2006-05097	Grey seal	2	AB	Male	0	0	2
2006	C2006-05098	Grey seal	2	H	Male	18	1	2
2006	C2006-05099	Grey seal	2	H	Male	0	0	2
2006	C2006-05100	Grey seal	1	C	Male	Not available	0	2
2006	C2006-05101	Grey seal	1	C	Female	0	0	2
2006	C2006-05102	Grey seal	1	C	Male	17	1	2
2006	C2006-05103	Grey seal	1	BD	Female	4	0	2
2006	C2006-05246	Grey seal	1	AC	Female	2	0	2
2006	C2006-05247	Grey seal	1	AC	Female	1	0	2
2006	C2006-05248	Grey seal	1	BD	Female	2	0	2
2006	C2006-05249	Grey seal	1	AC	Female	6	0	2
2006	C2006-05250	Grey seal	1	AC	Female	7	0	2
2006	C2006-05251	Grey seal	1	BD	Female	4	0	2
2006	C2006-05253	Grey seal	1	AC	Female	1	0	2
2006	C2006-05254	Grey seal	1	AC	Female	2	0	2
2006	C2006-05255	Grey seal	1	AC	Female	10	0	2
2006	C2006-05256	Grey seal	1	X	Male	15	0	2
2006	C2006-05257	Grey seal	1	X	Male	11	0	2
2006	C2006-05258	Grey seal	1	AC	Male	1	0	2
2006	C2006-05259	Grey seal	1	AC	Female	5	0	2
2006	C2006-05260	Grey seal			Female	0	0	1
2006	C2006-05261	Grey seal	2	H	Male	0	0	1
2006	C2006-05263	Grey seal	1	X	Male	14	0	2
2006	C2006-05265	Grey seal	1	X	Male	12	0	2
2006	C2006-05266	Grey seal	1	X	Male	2	0	1
2006	C2006-05269	Grey seal	1	X	Female	9	0	2
2006	C2006-05270	Grey seal	1	X	Male	8	1	2
2006	C2006-05271	Grey seal	2	AB	Female	2	0	2
2006	C2006-05272	Grey seal	2	AB	Male	3	0	2
2006	C2006-05273	Grey seal	1	X	Female	0	0	2
2006	C2006-05274	Grey seal	1	X	Male	17	0	2
2006	C2006-05275	Grey seal	2	AB	Male	0	0	2
2006	C2006-05276	Grey seal	1	X	Female	1	0	2
2006	C2006-05277	Grey seal	1	X	Male	7	1	2
2006	C2006-05278	Grey seal	1	BD	Male	15	0	2
2006	C2006-05279	Grey seal	1	BD	Female	16	0	2
2006	C2006-05280	Grey seal	1	X	Male	12	0	2
2006	C2006-05281	Grey seal	1	X	Male	12	1	2
2006	C2006-05282	Grey seal	1	C	Male	9	0	2
2006	C2006-05284	Grey seal	2	H	Male	1	0	2
2006	C2006-05292	Grey seal	1	X	Male	0	0	1
2006	C2006-05293	Grey seal	1	X	Female	2	0	1
2006	C2006-05295	Grey seal	1	X	Male	13	1	1
2006	C2006-05329	Grey seal	1	X	Female	2	1	2
2006	C2006-05380	Grey seal	1	X	Male	5	0	1
2006	C2006-05381	Grey seal	1	X	Female	Not available	0	2
2006	C2006-05429	Grey seal	1	AC	Male	1	0	1
2007	A2007-05001	Grey seal	1	X	Male	19	0	1
2007	A2007-05063	Grey seal	2	M	Male	14	0	3
2007	A2007-05078	Grey seal	2	M	Female	1	0	1
2007	A2007-05157	Grey seal	2	D	Male	21	1	3
2007	A2007-05224	Grey seal	2	M	Female	40	0	3
2007	A2007-05257	Grey seal	1	AC	Female	1	0	1
2007	A2007-05259	Grey seal	2	E	Male	4	0	1
2007	A2007-05261	Grey seal	2	H	Female	5	0	1
2007	A2007-05279	Grey seal	1	AC	Male	3	0	1
2007	A2007-05280	Grey seal	2	H	Female	2	0	1
2007	A2007-05283	Grey seal	2	H	Female	3	0	1
2007	A2007-05284	Grey seal	1	Y	Male	2	0	1
2007	A2007-05285	Grey seal	2	H	Female	2	0	1
2007	A2007-05287	Grey seal	1	Y	Female	13	0	1
2007	A2007-05288	Grey seal	1	X	Male	12	0	1
2007	A2007-05292	Grey seal	2	H	Male	3	0	1
2007	A2007-05321	Grey seal	2	H	Male	2	0	1
2007	A2007-05331	Grey seal	2	H	Male	2	0	1
2007	A2007-05332	Grey seal	2	H	Male	2	0	1
2007	A2007-05333	Grey seal	2	H	Female	3	0	1
2007	A2007-05338	Grey seal	2	H	Male	0	0	1
2007	A2007-05368	Grey seal	2	H	Female	1	0	1
2007	A2007-05394	Grey seal	1	X	Female	15	0	1
2007	A2008-05287	Grey seal	2	I	Female	0	0	1
2007	A2010-05209	Grey seal	2	AB	Male	0	0	1
2007	C2007-00022	Grey seal	1	C	Male	0	0	1
2007	C2007-00025	Grey seal	2	AB	Male	0	0	2
2007	C2007-00220	Grey seal	2	AB	Male	11	0	2
2007	C2007-00221	Grey seal	2	AB	Female	6	0	2
2007	C2007-00222	Grey seal	2	AB	Male	4	0	2
2007	C2007-00223	Grey seal	1	C	Female	0	0	1
2007	C2007-00245	Grey seal	1	Y	Female	0	0	1
2007	C2007-00297	Grey seal	2	AB	Male	0	0	2
2007	C2007-00463	Grey seal	2	AB	Male	0	0	1
2007	C2007-00464	Grey seal	2	AB	Male	0	0	1
2007	C2007-04640	Grey seal	2	AB	Female	0	0	1
2007	C2007-07645	Grey seal	2	M	Male	3	0	3
2007	C2007-07646	Grey seal	2	M	Male	4	0	3
2007	C2007-07647	Grey seal	1	X	Female	17	0	1
2007	C2007-07649	Grey seal	2	AB	Male	0	0	1
2007	C2007-07650	Grey seal	2	AB	Female	0	0	1
2007	C2007-07652	Grey seal	2	H	Male	3	0	1
2007	C2007-07709	Grey seal	1	X	Male	Not available	0	1
2007	C2007-07710	Grey seal	1	Y	Female	0	0	1
2007	C2007-07711	Grey seal	2	D	Male	0	0	3
2007	C2007-07712	Grey seal	1	X	Female	0	0	1
2007	C2007-07718	Grey seal	1	X	Female	3	1	2
2007	C2007-07726	Grey seal	2	H	Male	0	0	2
2007	C2007-07730	Grey seal	2	E	Male	3	0	2
2007	C2007-07731	Grey seal	2	E	Female	1	0	2
2007	C2007-07733	Grey seal	2	H	Female	0	0	2
2007	C2007-07737	Grey seal	2	I	Male	0	0	1
2007	C2007-07741	Grey seal	1	BD	Male	0	0	2
2007	C2007-07742	Grey seal	2	AB	Female	9	0	2
2007	C2007-07743	Grey seal	1	BD	Female	2	0	2
2007	C2007-07745	Grey seal	1	BD	Female	21	0	2
2007	C2007-07746	Grey seal	2	AB	Female	0	0	2
2007	C2007-07747	Grey seal	2	AB	Male	0	0	2
2007	C2007-07801	Grey seal	1	X	Male	12	0	2
2007	C2007-07803	Grey seal	1	X	Male	19	1	2
2007	C2007-07804	Grey seal	1	X	Male	12	0	2
2007	C2007-07805	Grey seal	1	X	Male	21	0	2
2007	C2007-07806	Grey seal	1	X	Male	12	0	2
2007	C2007-07807	Grey seal	1	X	Male	9	0	2
2007	C2007-07808	Grey seal	1	X	Male	15	0	2
2007	C2007-07809	Grey seal	1	X	Female	8	0	2
2007	C2007-07811	Grey seal	1	X	Male	12	0	2
2007	C2007-07812	Grey seal	1	X	Female	2	0	2
2007	C2007-07865	Grey seal	1	BD	Female	11	0	2
2007	C2007-07866	Grey seal	1	BD	Male	2	0	2
2007	C2007-07867	Grey seal	1	BD	Male	4	0	2
2007	C2007-07868	Grey seal	1	BD	Female	2	0	2
2007	C2007-07869	Grey seal	1	BD	Female	3	0	2
2007	C2007-07870	Grey seal	1	BD	Female	0	0	2
2007	C2007-07921	Grey seal	1	BD	Female	9	0	2
2007	C2007-07922	Grey seal	1	BD	Female	10	0	2
2007	C2007-07923	Grey seal	1	C	Female	0	0	2
2007	C2007-07924	Grey seal	1	AC	Female	0	0	2
2007	C2007-07925	Grey seal	1	C	Female	0	0	2
2007	C2007-07926	Grey seal	1	C	Female	0	0	1
2007	C2007-07927	Grey seal	1	BD	Male	7	0	2
2007	C2007-07928	Grey seal	1	BD	Male	0	0	2
2007	C2007-07929	Grey seal	1	BD	Male	3	0	2
2007	C2007-07930	Grey seal	1	BD	Male	14	0	2
2007	C2007-07931	Grey seal	1	BD	Male	2	0	2
2007	C2007-07932	Grey seal	1	BD	Male	8	0	2
2007	C2007-07933	Grey seal	2	AB	Female	1	0	2
2007	C2007-07934	Grey seal	1	BD	Male	9	0	2
2007	C2007-07935	Grey seal	1	X	Male	5	1	2
2007	C2007-07936	Grey seal	2	AB	Female	2	1	2
2007	C2007-07937	Grey seal	1	Y	Male	26	0	2
2007	C2007-07938	Grey seal	1	Y	Female	5	0	2
2007	C2007-07939	Grey seal	2	I	Male	0	0	1
2007	C2007-07940	Grey seal	1	X	Male	23	0	2
2007	C2007-07941	Grey seal	1	X	Female	7	1	2
2007	C2007-07943	Grey seal	1	C	Unknown	0	0	2
2007	C2007-07944	Grey seal	1	C	Female	1	0	2
2007	C2007-07945	Grey seal	1	C	Male	0	0	2
2007	C2007-07985	Grey seal			Female	0	0	1
2007	C2007-08020	Grey seal	1	X	Female	0	0	1
2007	C2007-08021	Grey seal	1	AC	Female	9	0	2
2007	C2007-08023	Grey seal	1	AC	Female	8	0	2
2007	C2007-08025	Grey seal	1	AC	Female	13	0	2
2007	C2007-08027	Grey seal	1	AC	Male	Not available	0	2
2007	C2007-08028	Grey seal	1	AC	Male	3	0	2
2007	C2007-08029	Grey seal	1	Y	Male	0	0	2
2007	C2007-08036	Grey seal	2	AB	Male	0	0	1
2007	C2007-08041	Grey seal	1	C	Male	23	1	2
2007	C2007-08087	Grey seal	1	Y	Female	0	0	3
2008	A2008-05041	Grey seal	2	M	Male	3	0	3
2008	A2008-05095	Grey seal	1	X	Female	9	0	1
2008	A2008-05096	Grey seal	1	X	Male	16	0	1
2008	A2008-05107	Grey seal	1	Y	Male	11	0	3
2008	A2008-05146	Grey seal	1	X	Male	15	0	3
2008	A2008-05147	Grey seal	1	X	Male	1	0	1
2008	A2008-05203	Grey seal	1	X	Male	0	0	1
2008	A2008-05204	Grey seal	1	X	Male	5	0	1
2008	A2008-05271	Grey seal	2	H	Female	1	0	1
2008	A2008-05288	Grey seal	2	H	Male	3	0	1
2008	A2008-05289	Grey seal	2	H	Male	2	1	1
2008	A2008-05290	Grey seal	2	H	Male	5	0	1
2008	A2008-05292	Grey seal	2	H	Male	3	1	1
2008	A2008-05294	Grey seal	2	H	Male	2	0	1
2008	A2008-05296	Grey seal	2	H	Male	2	1	1
2008	A2008-05315	Grey seal	2	H	Male	5	1	1
2008	A2008-05316	Grey seal	2	H	Male	4	1	1
2008	A2008-05317	Grey seal	2	H	Female	3	1	1
2008	A2008-05329	Grey seal	2	M	Male	20	0	3
2008	A2008-05345	Grey seal	2	E	Female	4	0	1
2008	A2008-05420	Grey seal	2	H	Male	1	0	1
2008	A2008-05431	Grey seal	1	X	Male	11	1	1
2008	A2009-05019	Grey seal	1	X	Male	6	0	1
2008	A2011-05068	Grey seal	1	X	Male	Not available	1	1
2008	C2008-00001	Grey seal	1	X	Male	5	0	1
2008	C2008-00003	Grey seal	1	X	Male	1	0	1
2008	C2008-00018	Grey seal	2	AB	Male	0	0	1
2008	C2008-00019	Grey seal	2	AB	Male	0	0	1
2008	C2008-00020	Grey seal	2	AB	Unknown	7	1	2
2008	C2008-00021	Grey seal	2	AB	Male	7	1	2
2008	C2008-00022	Grey seal	2	AB	Female	6	0	2
2008	C2008-00023	Grey seal	2	AB	Female	2	0	2
2008	C2008-00024	Grey seal	2	AB	Female	14	0	2
2008	C2008-00025	Grey seal	2	AB	Male	12	0	2
2008	C2008-00026	Grey seal	2	AB	Female	9	0	2
2008	C2008-00067	Grey seal	2	H	Female	0	0	1
2008	C2008-00093	Grey seal	2	I	Male	0	0	1
2008	C2008-00488	Grey seal	1	X	Male	3	1	1
2008	C2008-00508	Grey seal	1	X	Female	13	0	2
2008	C2008-00509	Grey seal	1	X	Male	13	0	2
2008	C2008-00526	Grey seal	1	X	Male	15	0	2
2008	C2008-00528	Grey seal	1	X	Male	14	1	2
2008	C2008-00529	Grey seal	1	X	Male	5	1	2
2008	C2008-00530	Grey seal	1	X	Male	18	0	2
2008	C2008-00531	Grey seal	1	X	Male	16	1	2
2008	C2008-00533	Grey seal	1	Y	Male	12	0	1
2008	C2008-00534	Grey seal	1	C	Female	1	0	2
2008	C2008-00535	Grey seal	1	C	Female	0	0	2
2008	C2008-00536	Grey seal	1	C	Female	1	1	2
2008	C2008-00539	Grey seal	1	X	Male	Not available	0	2
2008	C2008-00540	Grey seal	1	X	Male	12	0	2
2008	C2008-00541	Grey seal	1	C	Male	18	1	2
2008	C2008-00542	Grey seal	1	X	Male	3	0	1
2008	C2008-00543	Grey seal	1	X	Male	18	0	2
2008	C2008-00545	Grey seal	2	H	Male	0	0	1
2008	C2008-00546	Grey seal	1	X	Male	7	0	2
2008	C2008-00547	Grey seal	1	X	Male	11	1	2
2008	C2008-00548	Grey seal	1	X	Female	3	0	2
2008	C2008-00549	Grey seal	1	Y	Male	14	0	2
2008	C2008-01116	Grey seal	1	X	Male	13	1	2
2008	C2008-01117	Grey seal	1	X	Male	1	0	1
2008	C2008-01118	Grey seal	1	X	Male	23	1	2
2008	C2008-01734	Grey seal	1	X	Female	1	0	2
2008	C2008-01735	Grey seal	1	X	Female	1	0	2
2008	C2008-01736	Grey seal	1	X	Female	3	0	2
2008	C2008-01737	Grey seal	1	BD	Male	0	0	2
2008	C2008-01738	Grey seal	1	X	Female	1	0	2
2008	C2008-01753	Grey seal	1	X	Female	12	0	2
2008	C2008-01754	Grey seal	1	X	Female	21	0	2
2008	C2008-01755	Grey seal	1	X	Male	16	1	2
2008	C2008-03145	Grey seal	2	D	Male	4	0	2
2008	C2008-03153	Grey seal	2	D	Female	1	0	2
2008	C2008-03154	Grey seal	1	X	Male	2	1	2
2008	C2008-03155	Grey seal	2	D	Female	1	0	2
2008	C2008-03748	Grey seal	2	AB	Male	2	0	2
2008	C2008-03751	Grey seal	1	C	Male	14	1	2
2008	C2008-03927	Grey seal	1	Y	Male	0	0	1
2008	C2008-04480	Grey seal	2	AB	Male	12	1	2
2008	C2008-04481	Grey seal	1	X	Male	16	0	2
2008	C2008-04482	Grey seal	1	X	Male	22	1	2
2008	C2008-04708	Grey seal	1	Y	Male	11	0	2
2008	C2008-04709	Grey seal	1	Y	Male	11	0	2
2008	C2008-07373	Grey seal	1	X	Male	20	0	2
2008	C2008-07374	Grey seal	1	X	Male	5	0	2
2008	C2008-07375	Grey seal	1	X	Male	13	1	2
2008	C2008-08617	Grey seal	1	C	Male	4	1	2
2008	C2008-08854	Grey seal	2	H	Male	5	0	2
2008	C2008-08855	Grey seal	2	H	Male	10	0	2
2008	C2008-08866	Grey seal	1	X	Female	4	0	2
2008	C2008-08867	Grey seal	1	BD	Female	5	0	2
2008	C2008-08868	Grey seal	1	BD	Female	5	0	2
2008	C2008-08869	Grey seal	1	BD	Female	9	1	2
2008	C2008-08871	Grey seal	1	BD	Male	5	0	2
2008	C2008-08872	Grey seal	1	BD	Female	4	1	2
2008	C2008-08873	Grey seal	1	BD	Male	5	0	2
2008	C2008-08874	Grey seal	1	BD	Female	27	1	2
2008	C2008-08875	Grey seal	1	BD	Male	5	0	2
2008	C2008-08876	Grey seal	1	BD	Male	4	1	2
2008	C2008-08877	Grey seal	1	BD	Male	15	0	2
2008	C2008-08878	Grey seal	1	BD	Female	4	0	2
2008	C2008-08879	Grey seal	1	BD	Female	4	0	2
2008	C2008-08880	Grey seal	1	BD	Female	6	0	2
2008	C2008-08882	Grey seal	1	BD	Female	3	0	2
2008	C2008-08883	Grey seal	1	BD	Male	2	0	2
2008	C2008-08884	Grey seal	1	BD	Male	1	0	2
2008	C2008-08894	Grey seal	1	BD	Female	10	0	2
2008	C2008-08905	Grey seal	1	X	Male	11	0	2
2008	C2008-08906	Grey seal	1	Y	Male	4	0	2
2008	C2008-08907	Grey seal	1	BD	Male	0	0	2
2008	C2008-08908	Grey seal	1	BD	Male	6	0	2
2008	C2008-08909	Grey seal	1	BD	Male	3	0	2
2008	C2008-08910	Grey seal	1	BD	Male	16	0	2
2008	C2008-08917	Grey seal	1	BD	Female	12	1	2
2008	C2008-08918	Grey seal	1	BD	Female	4	0	2
2008	C2008-08919	Grey seal	1	BD	Female	18	0	2
2008	C2008-08920	Grey seal	1	BD	Male	6	0	2
2008	C2008-08921	Grey seal	1	BD	Female	13	0	2
2008	C2008-08922	Grey seal	1	BD	Male	22	1	2
2008	C2008-08923	Grey seal	1	BD	Male	6	0	2
2008	C2008-08924	Grey seal	1	BD	Male	9	0	2
2008	C2008-09043	Grey seal	1	X	Male	14	0	2
2008	C2008-09044	Grey seal	1	Y	Male	13	0	2
2008	C2008-09045	Grey seal	1	Y	Male	14	0	2
2008	C2008-09046	Grey seal	1	X	Male	12	0	2
2008	C2008-09122	Grey seal	1	X	Male	2	0	2
2008	C2008-09123	Grey seal	1	X	Male	2	0	2
2008	C2008-09124	Grey seal	1	AC	Male	8	0	2
2008	C2008-09125	Grey seal	1	AC	Female	15	0	2
2008	C2008-09127	Grey seal	1	X	Male	20	1	2
2008	C2008-09128	Grey seal	1	X	Male	14	0	2
2008	C2008-09129	Grey seal	1	X	Male	11	1	2
2008	C2008-09131	Grey seal	1	X	Male	9	0	2
2008	C2008-09132	Grey seal	1	X	Female	9	1	2
2008	C2008-09133	Grey seal	1	X	Male	9	0	2
2008	C2008-09134	Grey seal	1	X	Male	13	0	2
2008	C2008-09135	Grey seal	1	X	Male	5	1	2
2008	C2008-09138	Grey seal	1	X	Female	8	0	2
2008	C2008-09139	Grey seal	1	X	Female	22	0	2
2008	C2008-09140	Grey seal	1	X	Female	2	0	2
2008	C2008-09141	Grey seal	1	X	Male	3	0	2
2008	C2008-09142	Grey seal	1	X	Female	5	0	2
2008	C2008-09143	Grey seal	1	X	Female	10	0	2
2008	C2008-09309	Grey seal	2	H	Male	26	1	2
2008	C2008-09310	Grey seal	2	E	Male	3	1	2
2008	C2008-09412	Grey seal	1	X	Male	5	0	2
2009	A2009-05002	Grey seal	2	M	Female	1	0	3
2009	A2009-05007	Grey seal	1	X	Male	13	0	1
2009	A2009-05018	Grey seal	1	X	Male	15	0	1
2009	A2009-05022	Grey seal	1	X	Male	12	0	1
2009	A2009-05024	Grey seal	2	E	Male	14	1	3
2009	A2009-05044	Grey seal	1	X	Female	10	0	1
2009	A2009-05045	Grey seal	1	X	Female	14	0	1
2009	A2009-05129	Grey seal	1	X	Male	16	0	1
2009	A2009-05130	Grey seal	1	Y	Male	17	0	1
2009	A2009-05131	Grey seal	1	Y	Male	20	0	1
2009	A2009-05290	Grey seal	2	M	Female	0	0	1
2009	A2009-05311	Grey seal	1	X	Male	9	1	1
2009	A2009-05393	Grey seal	2	H	Male	4	0	1
2009	A2009-05397	Grey seal	2	AB	Male	2	1	1
2009	A2009-05398	Grey seal	2	AB	Male	2	0	1
2009	A2009-05399	Grey seal	2	AB	Male	4	0	1
2009	A2009-05400	Grey seal	2	H	Female	3	0	1
2009	A2009-05411	Grey seal	2	AB	Male	17	1	3
2009	A2009-05412	Grey seal	1	Y	Male	12	0	1
2009	A2009-05443	Grey seal	2	H	Male	6	0	1
2009	A2009-05445	Grey seal	2	H	Male	1	0	1
2009	A2009-05446	Grey seal	2	H	Male	3	1	1
2009	A2009-05447	Grey seal	2	E	Male	1	1	1
2009	A2009-05448	Grey seal	2	M	Female	0	0	1
2009	A2009-05450	Grey seal	1	X	Male	6	0	1
2009	A2009-05486	Grey seal	1	C	Female	8	0	1
2009	A2010-05002	Grey seal	2	K	Male	0	0	1
2009	A2010-05034	Grey seal	1	AC	Female	2	0	2
2009	A2010-05035	Grey seal	2	E	Female	5	0	2
2009	A2010-05036	Grey seal	1	BD	Male	6	0	2
2009	A2010-05037	Grey seal	1	BD	Male	2	0	2
2009	A2010-05038	Grey seal	1	BD	Female	7	0	2
2009	A2010-05039	Grey seal	1	X	Male	12	0	2
2009	A2010-05040	Grey seal	1	Y	Male	15	0	2
2009	A2010-05041	Grey seal	1	X	Female	0	0	2
2009	A2010-05042	Grey seal	1	X	Male	13	1	2
2009	A2010-05043	Grey seal	1	X	Female	17	0	2
2009	A2010-05069	Grey seal	2	H	Male	7	0	1
2009	A2010-05077	Grey seal	1	X	Male	0	0	1
2009	A2010-05117	Grey seal	1	BD	Female	1	0	2
2009	A2010-05118	Grey seal	1	BD	Male	2	0	2
2009	A2010-05119	Grey seal	1	BD	Male	5	0	2
2009	A2010-05120	Grey seal	1	BD	Female	4	0	2
2009	A2010-05121	Grey seal	1	BD	Female	2	0	2
2009	A2010-05122	Grey seal	1	BD	Female	2	0	2
2009	A2010-05123	Grey seal	1	BD	Female	11	0	2
2009	A2010-05124	Grey seal	1	BD	Male	8	0	2
2009	A2010-05125	Grey seal	1	BD	Female	4	0	2
2009	A2010-05126	Grey seal	2	H	Male	3	0	2
2009	A2010-05127	Grey seal	1	BD	Female	1	0	2
2009	A2010-05128	Grey seal	1	BD	Female	0	0	2
2009	A2010-05129	Grey seal	1	BD	Female	0	0	2
2009	A2010-05130	Grey seal	1	BD	Female	5	0	2
2009	A2010-05131	Grey seal	1	BD	Female	1	0	2
2009	A2010-05132	Grey seal	1	BD	Female	1	0	2
2009	A2010-05133	Grey seal	1	BD	Female	6	0	2
2009	A2010-05134	Grey seal	1	BD	Female	15	0	2
2009	A2010-05135	Grey seal	1	BD	Female	4	0	2
2009	A2010-05137	Grey seal	1	BD	Female	4	0	2
2009	A2010-05138	Grey seal	1	BD	Female	1	0	2
2009	A2010-05139	Grey seal	1	X	Male	2	1	2
2009	A2010-05140	Grey seal	1	X	Female	4	1	2
2009	A2010-05141	Grey seal	1	X	Male	2	0	2
2009	A2010-05146	Grey seal	1	X	Male	4	1	2
2009	A2010-05214	Grey seal	2	AB	Female	0	0	1
2009	A2010-05225	Grey seal	2	H	Female	0	0	1
2009	A2010-05251	Grey seal	1	X	Female	16	0	2
2009	A2010-05252	Grey seal	2	D	Female	3	1	2
2009	A2010-05253	Grey seal	2	D	Female	2	0	2
2009	A2010-05254	Grey seal	2	D	Female	0	0	2
2009	A2010-05255	Grey seal	1	X	Female	16	0	2
2009	A2010-05256	Grey seal	1	X	Female	2	0	2
2009	A2010-05257	Grey seal	1	X	Female	4	0	2
2009	A2010-05258	Grey seal	1	X	Male	11	1	2
2009	A2010-05259	Grey seal	1	X	Female	2	1	2
2009	A2010-05260	Grey seal	1	X	Female	0	0	2
2009	A2010-05276	Grey seal	1	X	Male	7	0	2
2009	A2010-05277	Grey seal	1	X	Male	Not available	0	2
2009	A2010-05278	Grey seal	2	H	Female	2	0	2
2009	A2010-05279	Grey seal	1	X	Male	4	0	2
2009	A2010-05280	Grey seal	1	X	Female	4	0	2
2009	A2010-05326	Grey seal	1	X	Male	7	1	2
2009	A2010-05416	Grey seal	2	D	Male	9	1	2
2009	A2010-05497	Grey seal	1	X	Male	6	1	1
2009	A2010-05498	Grey seal	2	H	Male	0	0	1
2009	A2011-05060	Grey seal	1	X	Female	6	0	1
2009	A2011-05070	Grey seal	1	C	Female	0	0	3
2009	A2011-05168	Grey seal			Male	0	0	1
2009	A2011-05281	Grey seal	2	H	Male	6	1	1
2009	A2011-05295	Grey seal	2	I	Male	0	0	1
2009	A2012-05053	Grey seal	1	X	Female	0	0	1
2009	A2012-05263	Grey seal	1	Y	Male	0	0	1
2009	C2009-00003	Grey seal	2	AB	Female	1	0	2
2009	C2009-00004	Grey seal	2	AB	Male	0	1	2
2009	C2009-00005	Grey seal	2	AB	Female	2	0	2
2009	C2009-00006	Grey seal	2	AB	Male	6	0	2
2009	C2009-00007	Grey seal	2	AB	Male	0	0	2
2009	C2009-00008	Grey seal	2	AB	Male	1	0	2
2009	C2009-00009	Grey seal	1	Y	Male	0	0	3
2009	C2009-00010	Grey seal	1	C	Male	Not available	1	2
2009	C2009-00011	Grey seal	1	C	Female	24	0	2
2009	C2009-00012	Grey seal	1	C	Female	9	0	2
2009	C2009-00013	Grey seal	1	C	Female	13	0	2
2009	C2009-00014	Grey seal	1	C	Unknown	1	0	2
2009	C2009-00015	Grey seal	1	C	Female	9	0	2
2009	C2009-00016	Grey seal	1	C	Female	4	0	2
2009	C2009-00017	Grey seal	1	C	Female	4	0	2
2009	C2009-00018	Grey seal	2	AB	Male	0	0	2
2009	C2009-00019	Grey seal	2	AB	Female	1	0	2
2009	C2009-00020	Grey seal	1	X	Male	10	0	2
2009	C2009-00021	Grey seal	1	X	Male	8	0	2
2009	C2009-00022	Grey seal	1	AC	Male	13	0	2
2009	C2009-00023	Grey seal	1	X	Male	0	0	1
2009	C2009-00380	Grey seal	2	I	Male	0	0	1
2009	C2009-00381	Grey seal	1	X	Male	0	0	1
2009	C2009-00382	Grey seal	1	X	Female	0	0	1
2009	C2009-00445	Grey seal	2	AB	Female	0	0	1
2009	C2009-00446	Grey seal	1	X	Female	0	0	1
2009	C2009-00447	Grey seal	2	E	Male	8	0	2
2009	C2009-00448	Grey seal	2	E	Male	6	0	2
2009	C2009-00451	Grey seal	1	X	Male	15	0	2
2009	C2009-00452	Grey seal	1	X	Male	23	1	2
2009	C2009-00453	Grey seal	1	X	Male	6	0	2
2009	C2009-00454	Grey seal	2	AB	Male	21	0	3
2009	C2009-02440	Grey seal	1	X	Female	6	1	2
2009	C2009-02441	Grey seal	1	X	Male	5	0	2
2009	C2009-02442	Grey seal	1	X	Female	3	0	2
2009	C2009-02443	Grey seal	1	X	Female	14	1	2
2009	C2009-03581	Grey seal	2	I	Male	0	0	1
2009	C2009-04318	Grey seal	1	Y	Male	7	1	2
2009	C2009-04319	Grey seal	2	AB	Male	11	1	2
2009	C2009-04445	Grey seal	1	AC	Male	4	1	2
2009	C2009-04446	Grey seal	1	AC	Female	17	0	2
2009	C2009-04447	Grey seal	2	E	Male	27	1	2
2009	C2009-04452	Grey seal	1	X	Female	5	0	2
2009	C2009-04453	Grey seal	1	X	Female	5	0	2
2009	C2009-04455	Grey seal	1	X	Female	14	0	2
2009	C2009-04456	Grey seal	1	X	Male	5	1	2
2009	C2009-04712	Grey seal	2	E	Female	0	0	1
2009	C2009-04789	Grey seal	2	E	Female	0	0	1
2009	C2009-05015	Grey seal	1	Y	Male	5	0	2
2009	C2009-05016	Grey seal	1	X	Male	13	1	2
2009	C2009-05017	Grey seal	1	X	Female	10	1	2
2009	C2009-05448	Grey seal	1	C	Female	1	1	2
2009	C2009-05449	Grey seal	1	C	Male	0	0	2
2009	C2009-05450	Grey seal	1	C	Male	0	0	2
2009	C2009-05451	Grey seal	1	Y	Male	7	0	2
2009	C2009-05452	Grey seal	1	Y	Male	7	0	2
2009	C2009-05453	Grey seal	1	Y	Male	10	1	2
2009	C2009-05454	Grey seal	1	X	Female	1	0	1
2009	C2009-05455	Grey seal	1	C	Male	8	1	2
2009	C2009-07363	Grey seal	1	X	Female	12	0	2
2009	C2009-07364	Grey seal	1	X	Female	5	0	2
2009	C2009-07365	Grey seal	1	X	Female	24	0	2
2009	C2009-07917	Grey seal	1	X	Female	7	0	2
2009	C2009-07918	Grey seal	1	X	Female	12	0	2
2009	C2009-07919	Grey seal	1	X	Female	6	0	2
2009	C2009-08586	Grey seal	1	X	Female	7	0	2
2009	C2009-08993	Grey seal	1	Y	Male	14	1	2
2009	C2009-08994	Grey seal	1	Y	Male	6	0	2
2009	C2009-11078	Grey seal	1	X	Female	Not available	0	2
2009	C2009-11184	Grey seal	1	Y	Female	0	0	1
2010	A2010-05032	Grey seal	2	K	Male	0	0	1
2010	A2010-05142	Grey seal	2	AB	Male	11	0	2
2010	A2010-05143	Grey seal	2	AB	Male	1	0	2
2010	A2010-05144	Grey seal	2	AB	Female	20	0	2
2010	A2010-05145	Grey seal	2	AB	Female	1	0	2
2010	A2010-05202	Grey seal	2	AB	Male	0	0	3
2010	A2010-05204	Grey seal	2	I	Male	0	0	1
2010	A2010-05205	Grey seal	2	K	Male	0	0	1
2010	A2010-05206	Grey seal	2	H	Male	0	0	1
2010	A2010-05207	Grey seal	2	H	Male	0	0	1
2010	A2010-05208	Grey seal	2	AB	Male	0	0	3
2010	A2010-05210	Grey seal	2	AB	Female	0	0	1
2010	A2010-05211	Grey seal			Female	0	0	1
2010	A2010-05264	Grey seal	1	X	Male	7	0	1
2010	A2010-05266	Grey seal	1	C	Male	7	1	3
2010	A2010-05281	Grey seal	1	Y	Male	0	0	2
2010	A2010-05282	Grey seal	1	X	Male	25	1	2
2010	A2010-05283	Grey seal	1	X	Female	0	0	1
2010	A2010-05284	Grey seal	1	X	Female	0	0	1
2010	A2010-05285	Grey seal	2	K	Female	0	0	1
2010	A2010-05327	Grey seal	1	C	Male	7	1	2
2010	A2010-05328	Grey seal	1	C	Female	9	0	2
2010	A2010-05329	Grey seal	1	C	Male	0	0	2
2010	A2010-05330	Grey seal	1	C	Female	0	0	2
2010	A2010-05331	Grey seal	1	C	Male	0	0	2
2010	A2010-05332	Grey seal	1	Y	Male	0	0	1
2010	A2010-05333	Grey seal	1	X	Female	20	0	2
2010	A2010-05334	Grey seal	2	H	Male	8	1	2
2010	A2010-05335	Grey seal	2	AB	Female	0	0	2
2010	A2010-05387	Grey seal	1	X	Male	25	0	1
2010	A2010-05389	Grey seal	1	Y	Male	7	0	1
2010	A2010-05392	Grey seal	2	E	Male	4	0	1
2010	A2010-05397	Grey seal	2	I	Female	0	0	3
2010	A2010-05406	Grey seal	2	AB	Female	0	0	2
2010	A2010-05407	Grey seal	1	X	Female	8	1	2
2010	A2010-05408	Grey seal	2	H	Female	1	0	1
2010	A2010-05409	Grey seal	2	H	Male	3	0	1
2010	A2010-05410	Grey seal	1	Y	Female	0	0	1
2010	A2010-05411	Grey seal	2	H	Male	21	0	2
2010	A2010-05412	Grey seal	2	H	Female	0	0	1
2010	A2010-05413	Grey seal	2	H	Male	0	0	1
2010	A2010-05414	Grey seal	2	H	Female	0	0	1
2010	A2010-05415	Grey seal	2	AB	Male	20	0	2
2010	A2010-05417	Grey seal	1	X	Female	7	0	2
2010	A2010-05418	Grey seal	1	X	Female	10	0	2
2010	A2010-05419	Grey seal	1	X	Male	10	0	2
2010	A2010-05420	Grey seal	1	X	Female	15	0	2
2010	A2010-05422	Grey seal	1	X	Male	7	0	2
2010	A2010-05423	Grey seal	1	X	Female	5	0	2
2010	A2010-05424	Grey seal	1	X	Female	8	0	2
2010	A2010-05425	Grey seal	1	X	Male	14	0	2
2010	A2010-05444	Grey seal	2	H	Male	0	0	1
2010	A2010-05446	Grey seal	2	H	Male	5	0	1
2010	A2010-05448	Grey seal	2	H	Male	3	0	1
2010	A2010-05464	Grey seal	1	X	Male	19	1	1
2010	A2010-05467	Grey seal	1	X	Male	1	0	1
2010	A2010-05470	Grey seal	2	M	Male	3	0	3
2010	A2010-05471	Grey seal	1	X	Male	15	0	1
2010	A2010-05473	Grey seal	2	H	Male	2	0	1
2010	A2010-05474	Grey seal	2	AB	Male	14	1	3
2010	A2010-05479	Grey seal	1	AC	Female	0	0	2
2010	A2010-05480	Grey seal	1	X	Male	0	0	2
2010	A2010-05481	Grey seal	1	X	Female	14	1	2
2010	A2010-05482	Grey seal	1	X	Female	15	0	2
2010	A2010-05483	Grey seal	1	X	Male	2	0	2
2010	A2010-05484	Grey seal	1	AC	Female	10	0	2
2010	A2010-05485	Grey seal	1	AC	Female	14	0	2
2010	A2010-05486	Grey seal	1	AC	Male	9	0	2
2010	A2010-05487	Grey seal	1	AC	Male	0	0	2
2010	A2010-05488	Grey seal	1	X	Female	19	0	2
2010	A2010-05489	Grey seal	2	H	Male	0	0	1
2010	A2010-05490	Grey seal	2	H	Female	0	0	1
2010	A2010-05491	Grey seal	2	D	Male	5	0	2
2010	A2010-05492	Grey seal	2	D	Female	4	0	2
2010	A2010-05493	Grey seal	2	D	Male	7	0	2
2010	A2010-05494	Grey seal	2	K	Female	0	0	1
2010	A2010-05496	Grey seal	2	H	Male	6	1	2
2010	A2010-05511	Grey seal	2	H	Male	9	1	2
2010	A2010-05512	Grey seal	1	AC	Male	17	0	1
2010	A2010-05516	Grey seal	2	H	Female	2	0	1
2010	A2010-05530	Grey seal	2	M	Male	2	0	3
2010	A2010-05545	Grey seal	2	H	Male	4	0	1
2010	A2011-05007	Grey seal	2	I	Male	26	0	1
2010	A2011-05009	Grey seal	2	I	Female	26	0	3
2010	A2011-05059	Grey seal	2	AB	Male	12	1	3
2010	A2011-05066	Grey seal	1	BD	Female	14	0	2
2010	A2011-05067	Grey seal	1	BD	Female	7	0	2
2010	A2011-05069	Grey seal	1	BD	Male	Not available	0	2
2010	A2011-05071	Grey seal	1	BD	Female	12	0	2
2010	A2011-05072	Grey seal	1	BD	Female	3	0	2
2010	A2011-05073	Grey seal	1	BD	Female	5	0	2
2010	A2011-05074	Grey seal	1	BD	Female	2	0	2
2010	A2011-05075	Grey seal	1	BD	Female	16	0	2
2010	A2011-05076	Grey seal	1	BD	Female	4	1	2
2010	A2011-05077	Grey seal	1	X	Female	14	0	2
2010	A2011-05078	Grey seal	1	X	Male	20	0	2
2010	A2011-05079	Grey seal	1	X	Male	0	0	2
2010	A2011-05080	Grey seal	1	X	Female	0	0	2
2010	A2011-05081	Grey seal	2	E	Female	3	1	2
2010	A2011-05082	Grey seal	1	BD	Female	3	0	2
2010	A2011-05083	Grey seal	1	BD	Male	1	0	2
2010	A2011-05084	Grey seal	1	BD	Female	14	0	2
2010	A2011-05085	Grey seal	2	H	Female	0	0	1
2010	A2011-05096	Grey seal	1	X	Male	11	1	3
2010	A2011-05108	Grey seal	2	M	Male	11	0	3
2010	A2011-05158	Grey seal	2	E	Male	1	0	1
2010	A2011-05159	Grey seal	1	BD	Male	2	0	2
2010	A2011-05160	Grey seal	1	BD	Female	7	1	2
2010	A2011-05161	Grey seal	1	BD	Female	6	0	2
2010	A2011-05162	Grey seal	1	BD	Female	10	0	2
2010	A2011-05163	Grey seal	1	BD	Female	4	0	2
2010	A2011-05164	Grey seal	1	BD	Male	2	0	2
2010	A2011-05165	Grey seal	1	BD	Female	7	0	2
2010	A2011-05166	Grey seal	1	BD	Female	5	0	2
2010	A2011-05167	Grey seal	2	H	Male	0	0	1
2010	A2011-05169	Grey seal	1	X	Male	0	0	1
2010	A2011-05217	Grey seal	2	H	Female	2	0	1
2010	A2011-05234	Grey seal	2	K	Male	0	0	1
2010	A2011-05235	Grey seal	2	K	Female	0	0	1
2010	A2011-05239	Grey seal	2	H	Female	0	0	1
2010	A2011-05296	Grey seal	1	AC	Female	4	0	2
2010	A2011-05297	Grey seal	1	AC	Female	4	0	2
2010	A2011-05298	Grey seal	1	AC	Male	16	0	2
2010	A2011-05299	Grey seal	1	AC	Female	3	0	2
2010	A2011-05300	Grey seal	1	AC	Female	3	0	2
2010	A2011-05301	Grey seal	1	BD	Female	13	0	2
2010	A2011-05302	Grey seal	1	BD	Male	14	0	2
2010	A2011-05303	Grey seal	1	BD	Male	9	0	2
2010	A2011-05304	Grey seal	2	H	Male	0	0	1
2010	A2011-05305	Grey seal	1	X	Male	4	0	2
2010	A2011-05306	Grey seal	1	Y	Male	18	1	2
2010	A2011-05307	Grey seal	1	Y	Male	6	0	2
2010	A2011-05308	Grey seal	1	AC	Male	7	1	2
2010	A2011-05407	Grey seal	2	K	Male	5	0	2
2010	A2011-05550	Grey seal	1	X	Male	0	0	1
2010	A2012-05266	Grey seal	2	H	Male	0	0	1
2010	A2012-05809	Grey seal	2	I	Female	0	0	3
2010	A2012-05905	Grey seal	2	H	Male	0	0	2
2010	A2013-05232	Grey seal	1	Y	Male	0	0	1
2011	A2010-05495	Grey seal	2	H	Male	0	0	1
2011	A2011-05170	Grey seal	2	H	Female	0	0	1
2011	A2011-05171	Grey seal	2	AB	Male	0	0	3
2011	A2011-05172	Grey seal	2	H	Male	0	0	1
2011	A2011-05173	Grey seal	2	E	Male	0	0	3
2011	A2011-05174	Grey seal	2	H	Female	0	0	1
2011	A2011-05175	Grey seal	1	X	Male	0	0	1
2011	A2011-05176	Grey seal	2	H	Female	0	0	1
2011	A2011-05177	Grey seal	2	AB	Female	0	0	1
2011	A2011-05178	Grey seal	2	H	Male	0	0	1
2011	A2011-05238	Grey seal	2	M	Male	4	0	1
2011	A2011-05290	Grey seal	2	H	Male	0	0	1
2011	A2011-05291	Grey seal	2	I	Female	0	0	3
2011	A2011-05292	Grey seal	2	AB	Female	0	0	2
2011	A2011-05293	Grey seal	2	H	Male	25	1	2
2011	A2011-05294	Grey seal	2	AB	Male	0	0	2
2011	A2011-05309	Grey seal	1	AC	Male	Not available	0	2
2011	A2011-05310	Grey seal	1	X	Male	5	1	2
2011	A2011-05335	Grey seal	2	M	Male	0	0	1
2011	A2011-05337	Grey seal	1	X	Female	20	1	3
2011	A2011-05401	Grey seal	2	H	Female	0	0	1
2011	A2011-05403	Grey seal	2	H	Female	0	0	1
2011	A2011-05404	Grey seal	2	H	Male	0	0	1
2011	A2011-05405	Grey seal	2	H	Male	0	0	1
2011	A2011-05406	Grey seal	2	H	Female	0	0	1
2011	A2011-05408	Grey seal	2	H	Female	0	0	1
2011	A2011-05409	Grey seal	1	AC	Female	0	0	3
2011	A2011-05410	Grey seal	2	M	Male	0	0	1
2011	A2011-05411	Grey seal	2	AB	Male	0	0	1
2011	A2011-05412	Grey seal	1	X	Male	0	1	1
2011	A2011-05414	Grey seal	2	M	Female	0	0	1
2011	A2011-05416	Grey seal	2	H	Female	2	1	1
2011	A2011-05418	Grey seal	2	H	Male	0	0	1
2011	A2011-05419	Grey seal	2	H	Female	3	0	1
2011	A2011-05428	Grey seal	2	H	Female	0	0	1
2011	A2011-05429	Grey seal	2	H	Male	5	1	1
2011	A2011-05430	Grey seal	2	H	Male	2	0	1
2011	A2011-05431	Grey seal	2	H	Male	2	0	1
2011	A2011-05434	Grey seal	2	E	Female	2	0	1
2011	A2011-05436	Grey seal	1	X	Male	6	0	1
2011	A2011-05439	Grey seal	2	H	Female	7	0	1
2011	A2011-05444	Grey seal	2	M	Male	5	0	1
2011	A2011-05445	Grey seal	2	H	Male	3	0	1
2011	A2011-05534	Grey seal	1	BD	Female	3	0	1
2011	A2011-05535	Grey seal	1	X	Male	16	0	1
2011	A2011-05542	Grey seal	2	H	Male	0	0	1
2011	A2011-05544	Grey seal	2	D	Female	1	0	2
2011	A2011-05545	Grey seal	2	D	Female	1	0	2
2011	A2011-05546	Grey seal	1	X	Female	0	0	2
2011	A2011-05547	Grey seal	1	AC	Male	5	0	2
2011	A2011-05548	Grey seal	1	X	Female	0	0	1
2011	A2011-05549	Grey seal	1	X	Male	0	0	1
2011	A2011-05552	Grey seal	1	BD	Male	18	0	2
2011	A2011-05553	Grey seal	1	BD	Male	0	0	2
2011	A2011-05555	Grey seal	2	H	Female	2	0	1
2011	A2011-05588	Grey seal	2	H	Male	19	1	2
2011	A2012-05047	Grey seal	1	Y	Female	8	0	1
2011	A2012-05048	Grey seal	2	M	Male	15	0	3
2011	A2012-05050	Grey seal	1	BD	Male	24	0	2
2011	A2012-05051	Grey seal	1	BD	Male	8	0	2
2011	A2012-05052	Grey seal	1	Y	Male	16	0	2
2011	A2012-05054	Grey seal	2	H	Female	0	0	1
2011	A2012-05055	Grey seal	1	Y	Male	16	0	2
2011	A2012-05056	Grey seal	1	Y	Male	13	0	2
2011	A2012-05057	Grey seal	2	H	Female	0	0	1
2011	A2012-05058	Grey seal	2	H	Female	0	0	1
2011	A2012-05059	Grey seal	2	AB	Female	0	0	1
2011	A2012-05066	Grey seal	1	BD	Female	8	0	2
2011	A2012-05067	Grey seal	1	BD	Male	4	1	2
2011	A2012-05068	Grey seal	1	BD	Female	15	0	2
2011	A2012-05069	Grey seal	1	Y	Male	2	0	2
2011	A2012-05070	Grey seal	1	Y	Female	8	0	2
2011	A2012-05071	Grey seal	2	D	Male	Not available	0	2
2011	A2012-05072	Grey seal	2	D	Female	0	0	2
2011	A2012-05073	Grey seal	2	H	Female	0	0	1
2011	A2012-05075	Grey seal	2	H	Male	0	0	1
2011	A2012-05078	Grey seal	2	H	Female	0	0	1
2011	A2012-05079	Grey seal	2	H	Male	0	0	1
2011	A2012-05081	Grey seal	2	H	Male	2	0	1
2011	A2012-05085	Grey seal	2	M	Male	3	0	3
2011	A2012-05262	Grey seal	1	X	Male	0	0	1
2011	A2012-05264	Grey seal	2	H	Male	0	0	1
2011	A2012-05265	Grey seal	2	M	Female	0	0	1
2011	A2012-05267	Grey seal	1	BD	Male	9	1	2
2011	A2012-05268	Grey seal	1	BD	Male	4	0	2
2011	A2012-05269	Grey seal	1	BD	Female	15	0	2
2011	A2012-05270	Grey seal	1	BD	Male	Not available	0	2
2011	A2012-05271	Grey seal	1	AC	Male	0	0	1
2011	A2012-05303	Grey seal	2	H	Female	2	0	1
2011	A2012-05323	Grey seal	1	BD	Female	14	0	2
2011	A2012-05324	Grey seal	1	BD	Male	3	0	2
2011	A2012-05325	Grey seal	1	BD	Female	4	0	2
2011	A2012-05326	Grey seal	2	H	Male	0	0	1
2011	A2012-05327	Grey seal	2	H	Male	0	0	1
2011	A2012-05333	Grey seal	2	H	Male	2	0	1
2011	A2012-05360	Grey seal	2	H	Male	4	0	1
2011	A2012-05458	Grey seal	2	H	Female	0	0	2
2011	A2012-05459	Grey seal	2	H	Male	14	1	2
2011	A2012-05460	Grey seal	2	D	Female	4	0	2
2011	A2012-05461	Grey seal	2	E	Male	6	1	2
2011	A2012-05462	Grey seal	2	H	Female	0	0	2
2011	A2012-05464	Grey seal	1	X	Male	19	0	2
2011	A2012-05465	Grey seal	1	X	Male	10	1	2
2011	A2012-05466	Grey seal	1	X	Female	20	0	2
2011	A2012-05467	Grey seal	1	Y	Male	9	0	2
2011	A2012-05514	Grey seal	1	X	Male	4	0	2
2011	A2012-05515	Grey seal	1	X	Male	6	1	2
2011	A2012-05516	Grey seal	1	X	Female	9	1	2
2011	A2012-05518	Grey seal	1	BD	Male	11	0	2
2011	A2012-05519	Grey seal	1	BD	Female	11	0	2
2011	A2012-05520	Grey seal	1	BD	Female	7	0	2
2011	A2012-05521	Grey seal	1	BD	Male	5	0	2
2011	A2012-05522	Grey seal	1	BD	Male	4	0	2
2011	A2012-05643	Grey seal	1	X	Male	9	1	2
2011	A2012-05777	Grey seal	2	H	Male	5	0	1
2011	A2012-05787	Grey seal	2	H	Male	5	1	1
2011	A2012-05816	Grey seal	1	C	Female	0	1	2
2011	A2012-05817	Grey seal	2	H	Female	2	1	1
2011	A2012-05900	Grey seal	2	H	Male	0	0	2
2011	A2012-05901	Grey seal	1	C	Male	0	1	2
2011	A2012-05902	Grey seal	1	X	Male	11	1	2
2011	A2012-05903	Grey seal	1	X	Male	0	1	2
2011	A2012-05909	Grey seal	1	X	Female	9	0	2
2011	A2012-05921	Grey seal	2	E	Female	18	0	2
2011	A2012-05923	Grey seal	2	H	Male	0	0	1
2011	A2012-05951	Grey seal	1	AC	Male	0	0	2
2011	A2012-05953	Grey seal	2	D	Male	9	0	2
2011	A2012-05955	Grey seal	1	X	Male	16	1	2
2011	A2013-05085	Grey seal	1	X	Female	5	1	2
2011	A2013-05093	Grey seal	1	C	Female	0	0	1
2012	A2012-05060	Grey seal	2	H	Female	2	0	1
2012	A2012-05074	Grey seal	2	H	Male	0	0	1
2012	A2012-05328	Grey seal	2	AB	Male	0	1	3
2012	A2012-05329	Grey seal	2	AB	Male	0	0	1
2012	A2012-05330	Grey seal	2	AB	Female	0	0	1
2012	A2012-05331	Grey seal	2	I	Female	0	0	1
2012	A2012-05362	Grey seal	2	AB	Male	2	1	1
2012	A2012-05463	Grey seal	2	M	Male	0	0	1
2012	A2012-05517	Grey seal	1	AC	Female	0	0	1
2012	A2012-05523	Grey seal	1	Y	Male	0	0	1
2012	A2012-05599	Grey seal	2	H	Male	0	0	1
2012	A2012-05600	Grey seal	2	H	Female	0	0	1
2012	A2012-05603	Grey seal	2	H	Male	6	1	1
2012	A2012-05640	Grey seal	2	H	Male	6	1	1
2012	A2012-05644	Grey seal	1	X	Male	16	1	2
2012	A2012-05645	Grey seal	2	H	Female	0	0	1
2012	A2012-05646	Grey seal	1	AC	Male	0	0	2
2012	A2012-05647	Grey seal	1	AC	Male	0	0	2
2012	A2012-05648	Grey seal	1	AC	Female	0	0	2
2012	A2012-05649	Grey seal	1	AC	Male	0	0	2
2012	A2012-05650	Grey seal	1	Y	Male	2	0	1
2012	A2012-05651	Grey seal	1	Y	Female	10	1	2
2012	A2012-05652	Grey seal	1	Y	Male	8	0	2
2012	A2012-05660	Grey seal	2	E	Male	3	1	1
2012	A2012-05719	Grey seal	2	M	Male	3	0	1
2012	A2012-05720	Grey seal	2	E	Female	2	0	1
2012	A2012-05735	Grey seal	2	H	Male	7	1	2
2012	A2012-05736	Grey seal	2	D	Male	26	1	2
2012	A2012-05738	Grey seal	2	H	Female	0	0	1
2012	A2012-05739	Grey seal	2	D	Female	0	0	3
2012	A2012-05740	Grey seal	2	E	Male	2	1	1
2012	A2012-05741	Grey seal	2	E	Male	3	0	1
2012	A2012-05746	Grey seal	2	H	Male	5	0	1
2012	A2012-05754	Grey seal	2	H	Male	1	0	1
2012	A2012-05755	Grey seal	2	H	Female	4	0	1
2012	A2012-05756	Grey seal	2	H	Male	2	0	1
2012	A2012-05757	Grey seal	1	X	Male	3	1	1
2012	A2012-05760	Grey seal	2	H	Male	6	0	1
2012	A2012-05762	Grey seal	2	M	Male	4	0	1
2012	A2012-05765	Grey seal	2	H	Male	5	0	1
2012	A2012-05766	Grey seal	2	H	Female	2	0	1
2012	A2012-05778	Grey seal	2	H	Female	3	0	1
2012	A2012-05793	Grey seal	2	M	Male	5	0	1
2012	A2012-05794	Grey seal	2	H	Male	2	0	1
2012	A2012-05797	Grey seal	1	X	Male	11	1	3
2012	A2012-05799	Grey seal	2	H	Male	4	0	1
2012	A2012-05807	Grey seal	2	M	Female	3	0	1
2012	A2012-05808	Grey seal	2	I	Female	0	1	3
2012	A2012-05810	Grey seal	1	X	Male	0	0	1
2012	A2012-05811	Grey seal	1	X	Female	3	0	2
2012	A2012-05812	Grey seal	1	X	Male	9	0	2
2012	A2012-05813	Grey seal	1	X	Male	6	0	2
2012	A2012-05814	Grey seal	1	X	Female	4	0	2
2012	A2012-05815	Grey seal	1	X	Female	0	0	2
2012	A2012-05825	Grey seal	2	E	Male	5	0	1
2012	A2012-05827	Grey seal	2	E	Male	6	1	1
2012	A2012-05904	Grey seal	1	X	Female	0	0	2
2012	A2012-05906	Grey seal	2	D	Female	25	0	2
2012	A2012-05907	Grey seal	2	D	Male	2	0	2
2012	A2012-05908	Grey seal	2	D	Male	1	0	2
2012	A2012-05910	Grey seal	2	H	Male	6	0	1
2012	A2012-05916	Grey seal	1	X	Female	1	0	1
2012	A2012-05922	Grey seal	2	AB	Male	2	0	2
2012	A2012-05924	Grey seal	1	Y	Male	0	0	1
2012	A2012-05925	Grey seal	1	X	Male	0	0	1
2012	A2012-05926	Grey seal	2	AB	Female	0	0	1
2012	A2012-05927	Grey seal	2	E	Male	0	0	2
2012	A2012-05928	Grey seal	2	E	Male	0	0	2
2012	A2012-05929	Grey seal	2	E	Male	0	0	2
2012	A2012-05930	Grey seal	2	E	Female	Not available	0	2
2012	A2012-05947	Grey seal	1	AC	Male	0	0	2
2012	A2012-05948	Grey seal	1	AC	Male	0	0	2
2012	A2012-05949	Grey seal	1	AC	Male	0	0	2
2012	A2012-05950	Grey seal	1	AC	Male	0	0	2
2012	A2012-05953	Grey seal	2	D	Male	9	0	2
2012	A2012-05954	Grey seal	2	D	Male	3	0	2
2012	A2013-05086	Grey seal	1	AC	Male	1	0	2
2012	A2013-05087	Grey seal	2	D	Female	22	1	2
2012	A2013-05233	Grey seal	1	X	Male	0	0	2
2012	A2013-05234	Grey seal	1	X	Male	0	0	2
2012	A2013-05344	Grey seal	1	BD	Male	3	0	2
2012	A2013-05345	Grey seal	1	BD	Male	3	0	2
2012	A2013-05346	Grey seal	1	AC	Female	18	0	2
2012	A2013-05347	Grey seal	1	AC	Male	8	1	2
2012	A2013-05349	Grey seal	1	BD	Male	3	0	2
2012	A2013-05350	Grey seal	1	AC	Male	16	0	2
2012	A2013-05353	Grey seal	1	BD	Female	4	0	2
2012	A2013-05418	Grey seal	1	BD	Female	4	0	2
2012	A2013-05419	Grey seal	1	BD	Female	3	0	2
2012	A2013-05420	Grey seal	1	BD	Female	8	0	2
2012	A2013-05421	Grey seal	1	BD	Female	7	0	2
2012	A2013-05423	Grey seal	1	BD	Female	4	0	2
2012	A2013-05424	Grey seal	1	BD	Female	6	0	2
2012	A2013-05425	Grey seal	1	BD	Female	9	0	2
2012	A2013-05426	Grey seal	1	BD	Female	11	0	2
2012	A2013-05427	Grey seal	1	BD	Female	3	0	2
2012	A2013-05457	Grey seal	1	BD	Female	5	0	2
2012	A2013-05458	Grey seal	1	BD	Female	3	0	2
2012	A2013-05459	Grey seal	1	BD	Female	11	0	2
2012	A2013-05460	Grey seal	1	BD	Female	13	0	2
2012	A2013-05461	Grey seal	1	BD	Female	4	0	2
2012	A2013-05477	Grey seal	1	BD	Female	0	0	2
2012	A2013-05478	Grey seal	1	BD	Female	2	1	2
2012	A2013-05479	Grey seal	1	X	Female	9	1	2
2012	A2013-05577	Grey seal	1	BD	Female	17	0	2
2012	A2013-05578	Grey seal	1	BD	Female	21	0	2
2012	A2013-05579	Grey seal	1	BD	Female	18	0	2
2012	A2013-05580	Grey seal	1	BD	Female	14	0	2
2012	A2014-05079	Grey seal	1	BD	Male	4	0	2
2012	A2014-05080	Grey seal	1	BD	Female	5	0	2
2012	A2014-05081	Grey seal	2	H	Male	2	0	2
2013	A2014-05168	Grey seal	1	BD	Male	9	0	2
2012	A2013-05003	Grey seal	2	AB	Male	16	1	3
2012	A2013-05083	Grey seal	1	X	Male	13	0	1
2012	A2013-05090	Grey seal	2	H	Male	0	0	1
2013	A2013-05094	Grey seal	1	X	Female	0	0	1
2012	A2013-05097	Grey seal	2	AB	Male	2	0	1
2012	A2013-05098	Grey seal	2	M	Male	3	0	1
2012	A2013-05215	Grey seal	2	H	Male	2	0	1
2013	A2013-05219	Grey seal	1	X	Male	18	0	1
2013	A2013-05230	Grey seal	2	M	Male	0	0	1
2013	A2013-05231	Grey seal	2	AB	Male	0	0	2
2013	A2013-05237	Grey seal	1	X	Female	0	1	2
2013	A2013-05238	Grey seal	1	X	Female	2	0	2
2013	A2013-05239	Grey seal	1	X	Female	14	0	2
2013	A2013-05241	Grey seal	1	X	Male	20	1	3
2013	A2013-05328	Grey seal	1	Y	Male	11	1	1
2013	A2013-05348	Grey seal	2	H	Female	0	0	1
2013	A2013-05351	Grey seal	2	I	Male	0	0	1
2013	A2013-05352	Grey seal	2	H	Male	0	0	1
2013	A2013-05369	Grey seal	2	H	Female	6	0	1
2013	A2013-05379	Grey seal	2	H	Male	3	0	1
2013	A2013-05422	Grey seal	2	H	Male	20	1	2
2013	A2013-05430	Grey seal	1	BD	Male	8	0	2
2013	A2013-05431	Grey seal	1	BD	Male	3	0	2
2013	A2013-05432	Grey seal	1	BD	Male	3	0	2
2013	A2013-05433	Grey seal	1	BD	Female	6	1	2
2013	A2013-05434	Grey seal	1	BD	Female	6	0	2
2013	A2013-05435	Grey seal	1	BD	Female	6	0	2
2013	A2013-05436	Grey seal	1	BD	Female	4	0	2
2013	A2013-05437	Grey seal	1	BD	Female	11	0	2
2013	A2013-05438	Grey seal	1	BD	Female	8	0	2
2013	A2013-05439	Grey seal	1	AC	Male	0	0	2
2012	A2013-05445	Grey seal	1	BD	Female	2	0	1
2013	A2013-05452	Grey seal	2	H	Female	2	0	1
2013	A2013-05453	Grey seal	1	AC	Female	0	0	2
2013	A2013-05454	Grey seal	1	AC	Male	0	0	2
2013	A2013-05455	Grey seal	1	AC	Female	0	0	2
2013	A2013-05456	Grey seal	1	BD	Female	Not available	0	2
2013	A2013-05462	Grey seal	1	BD	Male	1	0	2
2013	A2013-05465	Grey seal	2	AB	Male	3	0	1
2013	A2013-05466	Grey seal	2	H	Male	9	0	1
2013	A2013-05467	Grey seal	1	Y	Male	11	0	1
2013	A2013-05469	Grey seal	2	AB	Male	28	1	3
2013	A2013-05471	Grey seal	1	BD	Female	7	0	2
2013	A2013-05472	Grey seal	1	BD	Female	18	0	2
2013	A2013-05473	Grey seal	1	BD	Male	5	0	2
2013	A2013-05474	Grey seal	1	BD	Male	6	0	2
2013	A2013-05475	Grey seal	1	BD	Male	18	0	2
2013	A2013-05476	Grey seal	2	I	Female	0	0	3
2013	A2013-05480	Grey seal	2	AB	Male	12	1	2
2013	A2013-05482	Grey seal	2	H	Male	2	0	1
2013	A2013-05486	Grey seal	2	H	Male	2	0	1
2013	A2013-05509	Grey seal	2	H	Male	2	0	1
2013	A2013-05511	Grey seal	2	H	Male	2	0	1
2013	A2013-05514	Grey seal	2	H	Male	0	0	1
2013	A2013-05557	Grey seal	2	E	Male	3	1	1
2013	A2013-05559	Grey seal	2	H	Male	20	0	1
2013	A2013-05573	Grey seal	1	X	Male	Not available	1	2
2013	A2013-05574	Grey seal	1	X	Male	20	0	2
2013	A2013-05575	Grey seal	1	X	Female	Not available	1	2
2013	A2013-05582	Grey seal	2	H	Male	0	0	1
2013	A2013-05594	Grey seal	2	H	Female	2	0	1
2013	A2013-05611	Grey seal	1	X	Male	14	1	2
2013	A2013-05676	Grey seal	1	Y	Male	7	0	2
2013	A2014-05085	Grey seal	1	X	Female	3	0	2
2013	A2014-05086	Grey seal	1	X	Female	6	1	2
2013	A2014-05087	Grey seal	1	X	Female	9	0	2
2013	A2014-05088	Grey seal	1	X	Female	2	0	2
2013	A2014-05147	Grey seal	1	X	Female	4	0	2
2013	A2014-05148	Grey seal	1	X	Female	3	0	2
2013	A2014-05149	Grey seal	1	X	Unknown	0	0	2
2013	A2014-05150	Grey seal	1	X	Female	1	0	2
2013	A2014-05151	Grey seal	2	H	Male	15	1	2
2013	A2014-05152	Grey seal	2	E	Female	13	0	2
2013	A2014-05153	Grey seal	2	E	Male	6	0	2
2013	A2014-05155	Grey seal	2	M	Male	7	0	2
2013	A2014-05156	Grey seal	2	E	Male	3	0	2
2013	A2014-05162	Grey seal	2	E	Female	6	0	2
2013	A2014-05163	Grey seal	1	BD	Female	8	0	2
2013	A2014-05164	Grey seal	1	BD	Female	8	0	2
2013	A2014-05165	Grey seal	1	BD	Female	4	0	2
2013	A2014-05166	Grey seal	1	BD	Female	5	0	2
2013	A2014-05167	Grey seal	1	BD	Male	2	0	2
2013	A2014-05169	Grey seal	1	AC	Female	10	0	2
2013	A2014-05170	Grey seal	2	AB	Unknown	Not available	0	2
2013	A2014-05171	Grey seal	2	AB	Female	23	0	2
2013	A2014-05194	Grey seal	1	BD	Female	2	0	2
2013	A2014-05195	Grey seal	1	BD	Female	18	0	2
2013	A2014-05196	Grey seal	1	BD	Female	Not available	0	2
2013	A2014-05197	Grey seal	1	BD	Female	5	0	2
2013	A2014-05198	Grey seal	1	BD	Female	15	0	2
2013	A2014-05199	Grey seal	1	BD	Female	8	0	2
2013	A2014-05339	Grey seal	2	D	Female	3	0	2
2013	A2014-05340	Grey seal	2	D	Female	3	0	2
2013	A2014-05484	Grey seal	1	X	Female	6	0	2
2013	A2014-05487	Grey seal	1	Y	Female	0	0	1
2013	A2014-05489	Grey seal	1	BD	Male	3	0	2
2013	A2014-05490	Grey seal	1	BD	Female	8	1	2
2013	A2014-05491	Grey seal	1	X	Male	Not available	0	2
2013	A2014-05492	Grey seal	1	X	Male	17	0	2
2013	A2014-05495	Grey seal	1	X	Male	16	0	2
2013	A2014-05496	Grey seal	1	BD	Female	10	0	2
2013	A2014-05497	Grey seal	1	BD	Female	5	0	2
2013	A2014-05498	Grey seal	1	BD	Female	6	0	2
2013	A2014-05500	Grey seal	1	BD	Male	3	0	2
2013	A2014-05501	Grey seal	1	BD	Male	3	0	2
2013	A2014-05502	Grey seal	1	BD	Male	6	0	2
