# Supplementary material for: Emergence of the Zoonotic Biliary Trematode Pseudamphistomum truncatum in Grey Seals (Halichoerus grypus) in the Baltic Sea
Source: PLoS One. 2016 Oct 18;11(10):e0164782. doi: 10.1371/journal.pone.0164782 (PMC5068771; doi:10.1371/journal.pone.0164782)
Supplement: S2 Appendix — (XLSX) [file pone.0164782.s002.xlsx]

## Sheet: Blad1
SEAL ID	YEAR	CYPRINID PRESENCE (0=absent, 1= present)
GS_2002_1	2002	0
GS_2002_2	2002	0
GS_2002_3	2002	0
GS_2002_4	2002	0
GS_2002_5	2002	0
GS_2002_6	2002	0
GS_2002_7	2002	0
GS_2002_8	2002	0
GS_2002_9	2002	0
GS_2002_10	2002	0
GS_2002_11	2002	0
GS_2002_12	2002	0
GS_2002_13	2002	0
GS_2002_14	2002	0
GS_2002_15	2002	0
GS_2002_16	2002	0
GS_2002_17	2002	0
GS_2002_18	2002	0
GS_2002_19	2002	0
GS_2002_20	2002	0
GS_2002_21	2002	0
GS_2002_22	2002	0
GS_2002_23	2002	0
GS_2002_24	2002	0
GS_2002_25	2002	0
GS_2002_26	2002	0
GS_2002_27	2002	0
GS_2002_28	2002	0
GS_2002_29	2002	0
GS_2002_30	2002	0
GS_2002_31	2002	0
GS_2002_32	2002	0
GS_2002_33	2002	0
GS_2002_34	2002	0
GS_2002_35	2002	0
GS_2002_36	2002	0
GS_2002_37	2002	0
GS_2002_38	2002	0
GS_2002_39	2002	0
GS_2002_40	2002	0
GS_2002_41	2002	0
GS_2002_42	2002	0
GS_2002_43	2002	0
GS_2002_44	2002	0
GS_2002_45	2002	0
GS_2002_46	2002	0
GS_2002_47	2002	0
GS_2002_48	2002	0
GS_2002_49	2002	0
GS_2002_50	2002	0
GS_2002_51	2002	0
GS_2002_52	2002	0
GS_2002_53	2002	0
GS_2002_54	2002	0
GS_2002_55	2002	0
GS_2002_56	2002	0
GS_2002_57	2002	0
GS_2002_58	2002	0
GS_2002_59	2002	0
GS_2002_60	2002	0
GS_2002_61	2002	0
GS_2002_62	2002	0
GS_2002_63	2002	0
GS_2002_64	2002	0
GS_2002_65	2002	0
GS_2002_66	2002	0
GS_2002_67	2002	0
GS_2002_68	2002	0
GS_2002_69	2002	0
GS_2002_70	2002	0
GS_2002_71	2002	0
GS_2002_72	2002	0
GS_2002_73	2002	0
GS_2002_74	2002	0
GS_2002_75	2002	0
GS_2002_76	2002	0
GS_2002_77	2002	0
GS_2002_78	2002	0
GS_2002_79	2002	0
GS_2002_80	2002	0
GS_2003_1	2003	0
GS_2003_2	2003	0
GS_2003_3	2003	0
GS_2003_4	2003	0
GS_2003_5	2003	0
GS_2003_6	2003	0
GS_2003_7	2003	0
GS_2003_8	2003	0
GS_2003_9	2003	0
GS_2003_10	2003	0
GS_2003_11	2003	0
GS_2003_12	2003	0
GS_2003_13	2003	0
GS_2003_14	2003	0
GS_2003_15	2003	0
GS_2003_16	2003	0
GS_2003_17	2003	0
GS_2003_18	2003	0
GS_2003_19	2003	0
GS_2003_20	2003	0
GS_2003_21	2003	0
GS_2003_22	2003	0
GS_2003_23	2003	0
GS_2003_24	2003	0
GS_2003_25	2003	0
GS_2003_26	2003	0
GS_2003_27	2003	0
GS_2003_28	2003	0
GS_2003_29	2003	0
GS_2003_30	2003	0
GS_2003_31	2003	0
GS_2003_32	2003	0
GS_2003_33	2003	0
GS_2003_34	2003	0
GS_2003_35	2003	0
GS_2003_36	2003	0
GS_2003_37	2003	0
GS_2003_38	2003	0
GS_2003_39	2003	0
GS_2003_40	2003	0
GS_2003_41	2003	0
GS_2003_42	2003	0
GS_2003_43	2003	0
GS_2003_44	2003	0
GS_2003_45	2003	0
GS_2003_46	2003	0
GS_2003_47	2003	0
GS_2003_48	2003	1
GS_2003_49	2003	0
GS_2003_50	2003	0
GS_2003_51	2003	0
GS_2003_52	2003	0
GS_2003_53	2003	0
GS_2003_54	2003	0
GS_2003_55	2003	0
GS_2003_56	2003	0
GS_2003_57	2003	0
GS_2003_58	2003	0
GS_2003_59	2003	0
GS_2003_60	2003	0
GS_2003_61	2003	0
GS_2003_62	2003	0
GS_2003_63	2003	0
GS_2003_64	2003	0
GS_2003_65	2003	0
GS_2003_66	2003	0
GS_2003_67	2003	0
GS_2003_68	2003	0
GS_2003_69	2003	0
GS_2003_70	2003	0
GS_2003_71	2003	1
GS_2003_72	2003	0
GS_2003_73	2003	0
GS_2003_74	2003	0
GS_2003_75	2003	0
GS_2003_76	2003	0
GS_2003_77	2003	0
GS_2003_78	2003	0
GS_2003_79	2003	0
GS_2003_80	2003	0
GS_2003_81	2003	0
GS_2003_82	2003	0
GS_2003_83	2003	0
GS_2003_84	2003	0
GS_2003_85	2003	0
GS_2003_86	2003	0
GS_2003_87	2003	0
GS_2003_88	2003	0
GS_2003_89	2003	0
GS_2003_90	2003	0
GS_2003_91	2003	0
GS_2003_92	2003	0
GS_2003_93	2003	0
GS_2003_94	2003	0
GS_2003_95	2003	0
GS_2003_96	2003	0
GS_2003_97	2003	0
GS_2003_98	2003	0
GS_2003_99	2003	0
GS_2003_100	2003	0
GS_2003_101	2003	0
GS_2003_102	2003	0
GS_2003_103	2003	0
GS_2004_1	2004	0
GS_2004_2	2004	0
GS_2004_3	2004	0
GS_2004_4	2004	0
GS_2004_5	2004	0
GS_2004_6	2004	0
GS_2004_7	2004	0
GS_2004_8	2004	0
GS_2004_9	2004	0
GS_2004_10	2004	0
GS_2004_11	2004	0
GS_2004_12	2004	0
GS_2004_13	2004	0
GS_2004_14	2004	0
GS_2004_15	2004	0
GS_2004_16	2004	0
GS_2004_17	2004	0
GS_2004_18	2004	0
GS_2004_19	2004	0
GS_2004_20	2004	0
GS_2004_21	2004	0
GS_2004_22	2004	0
GS_2004_23	2004	0
GS_2004_24	2004	0
GS_2004_25	2004	0
GS_2004_26	2004	0
GS_2004_27	2004	0
GS_2004_28	2004	0
GS_2004_29	2004	0
GS_2004_30	2004	0
GS_2004_31	2004	0
GS_2004_32	2004	0
GS_2004_33	2004	0
GS_2004_34	2004	0
GS_2004_35	2004	0
GS_2004_36	2004	0
GS_2004_37	2004	0
GS_2004_38	2004	0
GS_2004_39	2004	0
GS_2004_40	2004	0
GS_2004_41	2004	0
GS_2004_42	2004	0
GS_2004_43	2004	0
GS_2004_44	2004	0
GS_2004_45	2004	0
GS_2004_46	2004	0
GS_2004_47	2004	0
GS_2004_48	2004	0
GS_2004_49	2004	0
GS_2004_50	2004	0
GS_2004_51	2004	0
GS_2004_52	2004	0
GS_2004_53	2004	0
GS_2004_54	2004	0
GS_2004_55	2004	0
GS_2004_56	2004	0
GS_2004_57	2004	0
GS_2004_58	2004	0
GS_2004_59	2004	0
GS_2004_60	2004	0
GS_2004_61	2004	0
GS_2004_62	2004	0
GS_2004_63	2004	0
GS_2004_64	2004	0
GS_2004_65	2004	0
GS_2004_66	2004	0
GS_2004_67	2004	0
GS_2004_68	2004	0
GS_2004_69	2004	0
GS_2004_70	2004	0
GS_2004_71	2004	0
GS_2004_72	2004	0
GS_2004_73	2004	0
GS_2004_74	2004	0
GS_2004_75	2004	0
GS_2004_76	2004	0
GS_2004_77	2004	0
GS_2004_78	2004	0
GS_2004_79	2004	0
GS_2004_80	2004	0
GS_2004_81	2004	0
GS_2004_82	2004	0
GS_2004_83	2004	0
GS_2004_84	2004	0
GS_2004_85	2004	0
GS_2004_86	2004	0
GS_2004_87	2004	0
GS_2004_88	2004	0
GS_2004_89	2004	0
GS_2004_90	2004	0
GS_2004_91	2004	0
GS_2004_92	2004	0
GS_2004_93	2004	0
GS_2004_94	2004	0
GS_2004_95	2004	0
GS_2004_96	2004	0
GS_2004_97	2004	0
GS_2004_98	2004	0
GS_2004_99	2004	0
GS_2004_100	2004	0
GS_2004_101	2004	0
GS_2004_102	2004	0
GS_2004_103	2004	0
GS_2004_104	2004	0
GS_2004_105	2004	0
GS_2004_106	2004	0
GS_2004_107	2004	0
GS_2004_108	2004	0
GS_2004_109	2004	0
GS_2004_110	2004	0
GS_2004_111	2004	0
GS_2004_112	2004	0
GS_2004_113	2004	0
GS_2004_114	2004	0
GS_2004_115	2004	0
GS_2005_1	2005	0
GS_2005_2	2005	0
GS_2005_3	2005	0
GS_2005_4	2005	0
GS_2005_5	2005	0
GS_2005_6	2005	0
GS_2005_7	2005	0
GS_2005_8	2005	0
GS_2005_9	2005	0
GS_2005_10	2005	0
GS_2005_11	2005	0
GS_2005_12	2005	0
GS_2005_13	2005	0
GS_2006_1	2006	0
GS_2006_2	2006	0
GS_2006_3	2006	0
GS_2006_4	2006	0
GS_2006_5	2006	0
GS_2007_1	2007	0
GS_2007_2	2007	0
GS_2007_3	2007	0
GS_2007_4	2007	0
GS_2007_5	2007	0
GS_2007_6	2007	0
GS_2007_7	2007	0
GS_2007_8	2007	0
GS_2007_9	2007	1
GS_2007_10	2007	1
GS_2007_11	2007	0
GS_2007_12	2007	0
GS_2007_13	2007	0
GS_2007_14	2007	0
GS_2007_15	2007	0
GS_2007_16	2007	0
GS_2007_17	2007	0
GS_2007_18	2007	0
GS_2008_1	2008	0
GS_2008_2	2008	0
GS_2008_3	2008	0
GS_2008_4	2008	0
GS_2008_5	2008	1
GS_2008_6	2008	0
GS_2008_7	2008	0
GS_2008_8	2008	0
GS_2008_9	2008	0
GS_2008_10	2008	0
GS_2008_11	2008	0
GS_2008_12	2008	0
GS_2008_13	2008	1
GS_2008_14	2008	0
GS_2008_15	2008	0
GS_2008_16	2008	0
GS_2008_17	2008	0
GS_2008_18	2008	0
GS_2008_19	2008	1
GS_2008_20	2008	0
GS_2008_21	2008	0
GS_2008_22	2008	0
GS_2008_23	2008	0
GS_2008_24	2008	0
GS_2008_25	2008	0
GS_2008_26	2008	0
GS_2008_27	2008	0
GS_2008_28	2008	0
GS_2008_29	2008	0
GS_2008_30	2008	0
GS_2008_31	2008	0
GS_2008_32	2008	1
GS_2008_33	2008	1
GS_2008_34	2008	0
GS_2009_1	2009	0
GS_2009_2	2009	0
GS_2009_3	2009	0
GS_2009_4	2009	0
GS_2009_5	2009	0
GS_2009_6	2009	1
GS_2009_7	2009	0
GS_2009_8	2009	0
GS_2009_9	2009	0
GS_2009_10	2009	0
GS_2009_11	2009	0
GS_2009_12	2009	0
GS_2009_13	2009	0
GS_2009_14	2009	0
GS_2009_15	2009	0
GS_2009_16	2009	0
GS_2009_17	2009	0
GS_2009_18	2009	0
GS_2009_19	2009	0
GS_2009_20	2009	0
GS_2009_21	2009	0
GS_2009_22	2009	0
GS_2009_23	2009	0
GS_2009_24	2009	0
GS_2009_25	2009	0
GS_2009_26	2009	0
GS_2009_27	2009	1
GS_2009_28	2009	0
GS_2009_29	2009	1
GS_2009_30	2009	0
GS_2009_31	2009	0
GS_2009_32	2009	0
GS_2009_33	2009	0
GS_2009_34	2009	0
GS_2009_35	2009	0
GS_2009_36	2009	0
GS_2009_37	2009	0
GS_2009_38	2009	0
GS_2009_39	2009	0
GS_2009_40	2009	0
GS_2009_41	2009	0
GS_2009_42	2009	0
GS_2009_43	2009	0
GS_2009_44	2009	0
GS_2009_45	2009	0
GS_2009_46	2009	1
GS_2009_47	2009	0
GS_2009_48	2009	0
GS_2009_49	2009	0
GS_2009_50	2009	1
GS_2009_51	2009	0
GS_2009_52	2009	0
GS_2009_53	2009	1
GS_2009_54	2009	0
GS_2009_55	2009	0
GS_2009_56	2009	0
GS_2009_57	2009	0
GS_2009_58	2009	0
GS_2009_59	2009	0
GS_2009_60	2009	0
GS_2009_61	2009	0
GS_2009_62	2009	0
GS_2009_63	2009	1
GS_2009_64	2009	0
GS_2009_65	2009	0
GS_2009_66	2009	1
GS_2009_67	2009	0
GS_2009_68	2009	0
GS_2009_69	2009	0
GS_2009_70	2009	0
GS_2009_71	2009	0
GS_2009_72	2009	0
GS_2009_73	2009	0
GS_2009_74	2009	0
GS_2009_75	2009	0
GS_2009_76	2009	0
GS_2010_1	2010	0
GS_2010_2	2010	0
GS_2010_3	2010	0
GS_2010_4	2010	0
GS_2010_5	2010	0
GS_2010_6	2010	0
GS_2010_7	2010	0
GS_2010_8	2010	1
GS_2010_9	2010	0
GS_2010_10	2010	1
GS_2010_11	2010	1
GS_2010_12	2010	0
GS_2010_13	2010	0
GS_2010_14	2010	0
GS_2010_15	2010	0
GS_2010_16	2010	0
GS_2010_17	2010	0
GS_2010_18	2010	1
GS_2010_19	2010	0
GS_2010_20	2010	0
GS_2010_21	2010	0
GS_2010_22	2010	0
GS_2010_23	2010	0
GS_2010_24	2010	0
GS_2010_25	2010	0
GS_2010_26	2010	0
GS_2010_27	2010	1
GS_2010_28	2010	0
GS_2010_29	2010	0
GS_2010_30	2010	0
GS_2010_31	2010	0
GS_2010_32	2010	0
GS_2010_33	2010	0
GS_2010_34	2010	0
GS_2010_35	2010	0
GS_2010_36	2010	0
GS_2010_37	2010	0
GS_2010_38	2010	0
GS_2010_39	2010	0
GS_2010_40	2010	0
GS_2010_41	2010	0
GS_2010_42	2010	0
GS_2010_43	2010	0
GS_2010_44	2010	0
GS_2010_45	2010	0
GS_2011_1	2011	0
GS_2011_2	2011	0
GS_2011_3	2011	0
GS_2011_4	2011	0
GS_2011_5	2011	1
GS_2011_6	2011	0
GS_2011_7	2011	0
GS_2011_8	2011	0
GS_2011_9	2011	1
GS_2011_10	2011	0
GS_2011_11	2011	0
GS_2011_12	2011	0
GS_2011_13	2011	0
GS_2011_14	2011	0
GS_2011_15	2011	0
GS_2011_16	2011	0
GS_2011_17	2011	0
GS_2011_18	2011	0
GS_2011_19	2011	0
GS_2011_20	2011	1
GS_2011_21	2011	0
GS_2011_22	2011	0
GS_2011_23	2011	0
GS_2011_24	2011	0
GS_2011_25	2011	0
GS_2011_26	2011	0
GS_2011_27	2011	0
GS_2011_28	2011	0
GS_2011_29	2011	0
GS_2011_30	2011	0
GS_2011_31	2011	0
GS_2011_32	2011	0
GS_2011_33	2011	0
GS_2011_34	2011	0
GS_2011_35	2011	0
GS_2011_36	2011	0
GS_2012_1	2012	0
GS_2012_2	2012	1
GS_2012_3	2012	0
GS_2012_4	2012	0
GS_2012_5	2012	0
GS_2012_6	2012	0
GS_2012_7	2012	0
GS_2012_8	2012	0
GS_2012_9	2012	0
GS_2012_10	2012	0
GS_2012_11	2012	0
GS_2012_12	2012	0
GS_2012_13	2012	0
GS_2012_14	2012	0
GS_2012_15	2012	0
GS_2012_16	2012	0
GS_2012_17	2012	0
GS_2012_18	2012	0
GS_2012_19	2012	0
GS_2012_20	2012	0
GS_2012_21	2012	0
GS_2012_22	2012	0
GS_2012_23	2012	1
GS_2012_24	2012	1
GS_2012_25	2012	1
GS_2012_26	2012	1
GS_2012_27	2012	1
GS_2012_28	2012	1
GS_2012_29	2012	0
GS_2012_30	2012	0
GS_2012_31	2012	0
GS_2012_32	2012	0
GS_2012_33	2012	1
GS_2012_34	2012	0
GS_2012_35	2012	0
GS_2012_36	2012	0
GS_2012_37	2012	0
GS_2012_38	2012	0
GS_2012_39	2012	0
GS_2012_40	2012	0
GS_2013_1	2013	0
GS_2013_2	2013	0
GS_2013_3	2013	0
GS_2013_4	2013	0
GS_2013_5	2013	0
GS_2013_6	2013	0
GS_2013_7	2013	0
